1      Benchmarking imputation methods for network  
2                      inference using a novel method of synthetic  
3                                      scRNA-seq data generation

4                      Ayoub Lasri<sup>1</sup>, Vahid Shahrezaei<sup>2</sup>, and Marc Sturrock<sup>1</sup>

5      **Abstract**

6      Single cell RNA-sequencing (scRNA-seq) has very rapidly become the new workhorse  
7      of modern biology providing an unprecedented global view on cellular diversity and  
8      heterogeneity. In particular, the structure of gene-gene expression correlation con-  
9      tains information on the underlying gene regulatory networks. However, interpreta-  
10     tion of scRNA-seq data is challenging due to specific experimental error and biases  
11     that are unique to this kind of data including drop-out (or technical zeros). To deal  
12     with this problem several methods for imputation of zeros for scRNA-seq have been  
13     developed. However, it is not clear how these processing steps affect inference of  
14     genetic networks from single cell data. Here, we introduce Biomodelling.jl, a tool  
15     for generation of synthetic scRNA-seq data using multiscale modelling of stochastic  
16     gene regulatory networks in growing and dividing cells. Our tool produces realistic  
17     transcription data with a known ground truth network topology that can be used  
18     to benchmark different approaches for gene regulatory network inference. Using this  
19     tool we investigate the impact of different imputation methods on the performance of  
20     several network inference algorithms. Biomodelling.jl provides a versatile and useful

21 tool for future development and benchmarking of network inference approaches using  
22 scRNA-seq data.

---

Corresponding author: [marcsturrock@rcsi.com](mailto:marcsturrock@rcsi.com)

<sup>1</sup>*Department of Physiology and Medical Physics, Royal College of Surgeons in Ireland, Dublin, Ireland*

<sup>2</sup>*Department of Mathematics, Faculty of Natural Sciences, Imperial College London, London SW7 2AZ, UK*

## 23 **1 Introduction**

24 A gene regulatory network (GRN) or genetic network (GN) refers to a collection of  
25 interacting genes in a cell which regulate each other indirectly through interaction  
26 of their protein expression products and regulatory parts of DNA and with other  
27 signalling systems in the cell, thereby governing the rates at which genes in the cell  
28 are transcribed into mRNA [1]. GRNs can be represented as graphs or networks,  
29 where the nodes of the network are genes and the edges between nodes represent gene  
30 interactions through which the products of one gene affect those of another. These  
31 interactions can be activating, with an increase in the expression of one leading to an  
32 increase in the other, or inhibiting, with an increase in one leading to a decrease in  
33 the other. Learning the structure and behaviour of GRNs is a fundamental problem  
34 in biology since many cellular processes, such as the cell cycle, cellular differentiation,  
35 and apoptosis are tightly controlled by GRNs. Hence the elucidation of these GRNs  
36 is of critical importance in many fields such as medicine and systems biology, however  
37 progress in deciphering them has been slow.

38 In recent years, high-throughput sequencing methods have revolutionised the en-  
39 tire field of biology. The opportunity to study entire transcriptomes in great detail  
40 using RNA sequencing (RNA-seq) has catalysed many important discoveries and is  
41 now a routine method in biomedical research. However, RNA-seq is typically per-  
42 formed in “bulk”, and the data represent an average of gene expression patterns  
43 across thousands to millions of cells. This averaging obscures biologically relevant  
44 differences between cells and limits the possible downstream analyses. Single-cell  
45 RNA-seq (scRNA-seq) represents an approach to overcome this problem [2]. By iso-  
46 lating single cells, capturing their transcripts, and generating sequencing libraries in  
47 which the transcripts are mapped to individual cells, scRNA-seq allows assessment  
48 of fundamental biological properties of cell populations and biological systems at  
49 unprecedented resolution.

50 Unlike traditional profiling methods that assess bulk populations, scRNA-seq  
51 offers an insight into biologically relevant cell-to-cell variations in gene expression.  
52 This includes understanding the tumour microenvironment [3] by revealing complex  
53 and rare populations [4], facilitating the tracking of trajectories of cell lineages [5]  
54 and providing insights into heterogeneity of stress response in microbes [6]. As we  
55 will explore in this paper, it can facilitate the inference of GRNs [7]. Nevertheless,  
56 many factors contribute to the rise of analysis challenges when dealing with scRNA-  
57 seq data, such factors can be divided into two main classes: technical variation  
58 (e.g. batch effect, cell specific capture efficiency, amplification bias and dropout  
59 events) and biological variation (e.g. stochastic gene expression, cell differentiation,  
60 environmental niche and cell cycle).

61 Over the last decade many inference methods have been developed to harness  
62 the available high-throughput data such as the RNA-seq data to uncover regula-  
63 tory interactions in GRNs. GRN inference is usually performed on measurements of  
64 gene-gene correlation, mutual information or regression models that can be obtained  
65 from bulk RNA-seq data across multiple conditions or perturbations or scRNA-seq  
66 across many cells. If a co-expression between two genes is detected, while consid-  
67 ering the expression of all others genes (conditional information), these genes are  
68 said to have a regulatory relationship. Several methods have been developed specif-  
69 ically for scRNA-seq [8, 9] but some reviews and benchmarking studies have shown  
70 that both bulk and single cell methods perform poorly on scRNA-seq data [10, 11].  
71 For more accurate GRN reconstruction several authors have remarked that prepro-  
72 cessing the data is important, mostly due to the sparse nature of the data [12, 13].  
73 Among different preprocessing steps, normalisation and imputation is of particular  
74 importance. In order to distinguish between biological and technical zeros (drop-out  
75 events), several imputation methods have been developed [14, 15, 16, 17, 18, 19] and  
76 compared in benchmark studies [20, 21]. The imputation step is often integrated

77 with normalisation and other downstream analysis as implemented in these methods  
78 [22, 19]. However, how imputation affects gene-gene correlations is not entirely clear  
79 although there have been some studies that have suggested that performing impu-  
80 tation improves the estimation of gene-gene correlations [18, 23]. So, there seems  
81 to be some potential for using imputation methods to improve GRN inference from  
82 scRNA-seq data.

83 While many methods have been developed for inference of gene regulatory net-  
84 works, evaluating the performance of these methods remains challenging due to lack  
85 of appropriate benchmarks. In general, there are three main strategies to gener-  
86 ate benchmark networks. A first strategy consists in evaluating network predictions  
87 made by reverse engineering algorithms on well-studied *in vivo* pathways from model  
88 organisms [24, 25]. However, those networks are incomplete maps of the physical in-  
89 teractions in the cell that are responsible for cellular functions and using them as  
90 benchmarks will inevitably lead to errors when evaluating network predictions. An-  
91 other strategy consists of genetically engineering synthetic *in vivo* networks [26, 27].  
92 The main drawback of this strategy is that only a few small networks are available.  
93 The third strategy consists of developing *in silico* gene regulatory networks that can  
94 be simulated to produce synthetic gene expression data that can be used in bench-  
95 marking. The simulation of *in silico* networks has the advantages of being fast, easily  
96 reproducible and less expensive than biological experiments and the ground truth is  
97 exactly known. However, for the synthetic data to be useful, it should have a realis-  
98 tic assumptions and statistical properties for the underlying GRN topology and gene  
99 expression.

100 Benchmark synthetic data generators such as “artificial gene networks” [28] aim  
101 to produce *in silico* gene networks exhibiting topological properties observed in bio-  
102 logical networks using Erdős-Renyi, Watts-Strogatz (small-world) or Albert-Barabási  
103 (scale-free) random graph models. Other approaches have been taken in SynTReN [29]

104 and [30] where general network structures were created by extracting parts of known  
105 *in vivo* regulatory network structures. These approaches have the advantage of cap-  
106 turing several structural properties observed in *in vivo* network structures. In order  
107 to produce temporal gene expression data, the generated structures are often made  
108 using dynamical models of gene regulation. Systems of non-linear ordinary differen-  
109 tial equations (ODEs) are widely used [31]. As current high-throughput technologies  
110 that simultaneously monitor protein expression are limited, some benchmark gen-  
111 erators consider mRNA as a proxy for protein expression and thus do not model  
112 translation independently of transcription [30, 29]. Protein expression in general  
113 does not correlate well with mRNA expression in many biological systems [32]. To  
114 overcome this, several benchmark synthetic data generators have accounted for tran-  
115 scription and translation explicitly such as RENCO [33], GeNGe [34] and GREN-  
116 DEL [35]. GeneNetWeaver has become a commonly used tool in recent years to  
117 generate gene expression data and GRN model evaluations [36]. For instance, it was  
118 selected to generate the “gold standard” networks for the DREAM4 and DREAM5  
119 network inference challenges, as well as other publications that conducted compar-  
120 isons of network modelling approaches [37, 38, 39]. GeneNetWeaver uses chemical  
121 langevin equations to simulate stochastic gene expression and allows for both inde-  
122 pendent (‘additive’) and synergistic (‘multiplicative’) interactions. Among methods  
123 that creates statistically realistic synthetic scRNA-seq data generation method is  
124 splatter [40]. Splatter implements six different simulation models ranging from a  
125 simple negative Binomial model to a more sophisticated gamma-Poisson hierarchical  
126 model, however, it assumes no correlation in expression among different genes. Fi-  
127 nally, MeSCoT was released recently which is a synthetic data generator developed  
128 in MATLAB for the detailed simulation of genes’ regulatory interactions for variable  
129 genomic architectures which can also produce a complete set of transcriptional and  
130 translational data together with simulated quantitative trait values [41]. So, while

131 there are several *in silico* methods available for simulating gene expression data,  
132 currently no method produces synthetic scRNA-seq data with realistic expression  
133 statistics as expected by stochastic gene expression and scRNA-seq protocols.

134 In this paper, we propose a novel *in silico* tool written purely in Julia [42] to gen-  
135 erate synthetic scRNA-seq data suitable for benchmarking GRN inference methods,  
136 `Biomodelling.jl`<sup>1</sup>. Our method uses an agent-based method to couple stochastic sim-  
137 ulations of realistic GRNs in a population of growing and dividing cells. We couple  
138 cell size to transcription as has recently been observed in different cellular systems  
139 [43] and include translation, binomial partitioning of molecules upon cell division and  
140 capture efficiency of the scRNA-seq steps. Here, we used `Biomodelling.jl` to system-  
141 atically benchmark the impact of different imputation methods on the performance  
142 of network inference algorithms.

143 The format of this paper is as follows. We begin in section 2 by introducing our  
144 method of synthetic data generation as well as the different imputation methods and  
145 network inference methods we wish to assess. We then begin section 3 by presenting  
146 a toy 5 gene example as an exemplar of our method and use it to illustrate the central  
147 problem of overcoming the negative impact of downsampling on network inference.  
148 Next we show that the network inference methods perform better on sparser data  
149 before going onto show how the different imputation methods and network inference  
150 methods perform using realistic scale-free topologies. We show that multiplicative  
151 regulation is the most challenging for accurate network inference. We then show that  
152 the best choice of imputation method for accurate inference depends on the choice  
153 of inference method. Finally we show that the number of combination reactions  
154 (where a gene has multiple regulators) considered rather than the size of the network  
155 determines overall performance. We end with a discussion in section 4 and make some  
156 recommendations for how best to pre-process scRNA-seq data for network inference.

---

<sup>1</sup>[\\*https://github.com/ayoubblasri/Biomodelling.jl](https://github.com/ayoubblasri/Biomodelling.jl)

## 157 **2 Methods**

### 158 **2.1 Biomodelling.jl**

159 *Biomodelling.jl* is a tool for multiscale agent-based modelling of scRNA-seq data that  
160 simulates stochastic gene expression in a population of single cells that are growing  
161 and dividing, written in the Julia programming language. The unique feature of  
162 *Biomodelling.jl* is that it can generate synthetic scRNA-seq from a known underlying  
163 gene regulatory network including global transcription-cell volume relationships.  
164 In Figure 1, we describe the main steps in order to generate synthetic ground truth  
165 (GT) data using *Biomodelling.jl*, which is available to the community as open source  
166 software. The gene-gene correlation that is exhibited in the Biomodelling.jl synthetic  
167 data provides benchmarking data for testing the efficiency of network inference meth-  
168 ods. Details about each step are given in the following sections.

#### 169 **2.1.1 Network topology, sparsity and simulation**

170 In this study, we considered two different types of topology. The first one consists  
171 of random connections allowing genes to be regulated by at most one other gene.  
172 This topology is referred to in the manuscript as random one regulation (ROR). The  
173 second topology considered in this study is a scale free (SF) network topology [44].  
174 Growing evidence has suggested that gene regulatory networks follow a scale free  
175 topology [45, 46]. The function *static\_scale\_free()* from *LightsGraphs* Julia Package  
176 (v1.3.5) was used to generate SF topologies. Introducing this more realistic topology  
177 means that genes may be regulated by multiple other genes; we allowed for at most  
178 four regulators for each gene. In this study, 20-gene and 50-gene regulatory networks  
179 were considered.

180 GRNs are known to be sparse [47, 48, 49] and characterised by a relatively small  
181 fraction of regulatory links between genes. In order to evaluate the effect of network



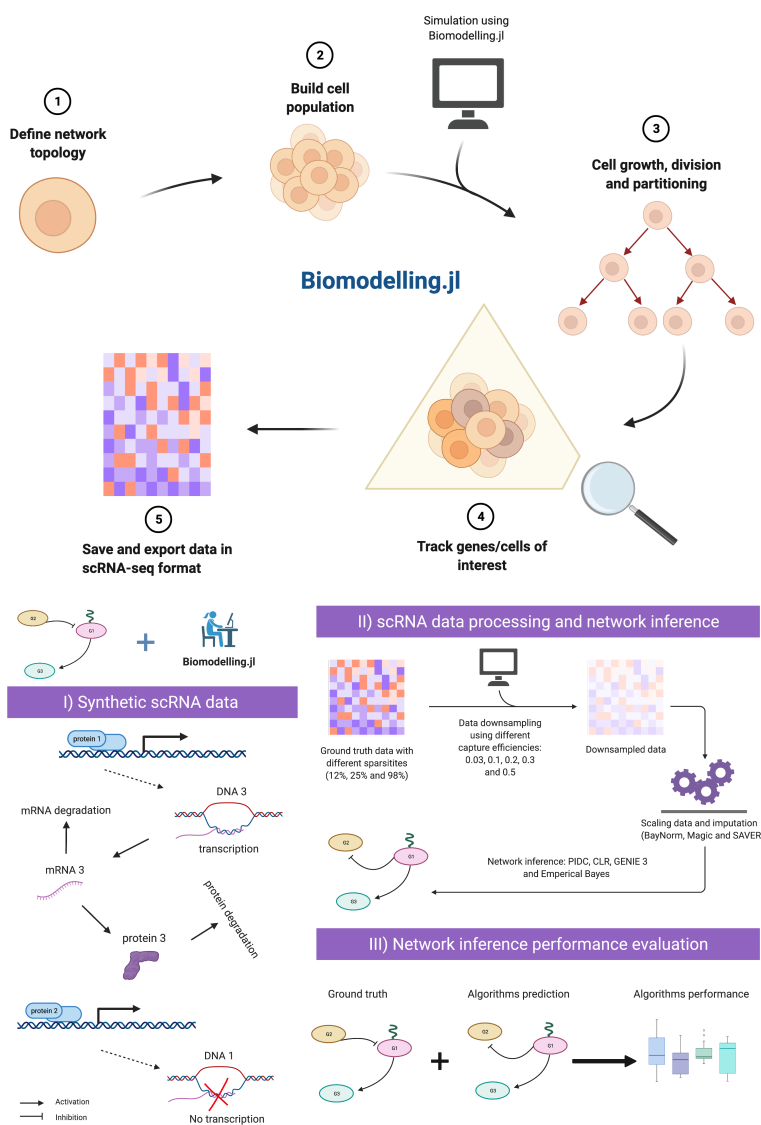

Figure 1: Biomodelling.jl workflow: (1) defining the gene regulatory network topology, interactions and parameters related to gene expression (2) choosing the number of cells and parameters related to cell population such as cell volume control and division noise, (3) couple a stochastic simulation algorithm of biochemical reactions with cell growth, size and division and simulate the cell population, (4) track genes or cells of interest and finally (5) save and export the data in a matrix similar to scRNA-seq data format. (I) synthetic data are generated using *Biomodelling.jl* using different sparsities as described in the Methods section 2.1.1, (II) the obtained data are downsampled, then imputation and network inference are performed as described in Methods section 2.3 and 2.4, finally (III) network inference algorithms predictions are compared with the GT network using metrics presented in Methods section 2.5.

182 sparsity on the performance of inference methods, we considered different levels of  
183 sparsity in the simulated networks defined as percentages of all possible links in  
184 the GRN excluding self-regulation. Specifically, we used sparsities corresponding to  
185 2.5%, 5% and 10% of possible connections for 20-genes network and 1%, 2% and  
186 4% for 50-genes network. We note that by choosing these sparsity levels we make  
187 sure that the percentage of possible connections is kept the same for both networks.  
188 Though the graphs generated were directed, in this study we only used undirected  
189 information since the network inference methods only outputted this information  
190 (apart from GENIE3). As an example, 2.5% of possible links in a 20-gene network  
191 corresponds to 5 links that were simulated using the two topologies mentioned in the  
192 previous paragraph.

Several chemical reactions stochastic simulation methods have been implemented  
in *Biomodelling.jl*, the stochastic simulation algorithm (SSA), tau leaping, adaptive  
tau leaping and non negative poisson tau leaping [50, 51, 52]. For the purpose of this  
paper, only tau leaping or SSA have been used to simulate the chemical reactions.  
Our single cell level model simulates gene transcription at a rate which depends on  
the cell volume, with the transcription rate of a gene in cell  $i$  being

$$k_{1i} = k_1 V_i$$

193 where  $V_i$  is the volume of cell  $i$  and  $k_1$  is the basal transcription rate. This kind  
194 of transcription scaling has been reported in mammalian and yeast cells [43, 53, 8],  
195 where the authors showed that the numbers of constitutive and inducible mRNAs  
196 scale with cell size. We also simulate translation, mRNA decay, protein decay, acti-  
197 vation and inhibition as shown in Figure 1 (I).

## 198 2.1.2 Types of reactions simulated

Activation and inhibition reactions were modelled as Hill functions  $f_{act}$  and  $f_{inh}$  respectively and defined as follows for a given activator/inhibitor X

$$f_{act}(X) = \frac{X^n}{K^n + X^n},$$

$$f_{inh}(X) = \frac{K^n}{K^n + X^n},$$

199 with  $n$  represents the Hill coefficient and  $K$  being the microscopic dissociation con-  
200 stant. If gene Y is activated or inhibited by gene X its transcription rate becomes  
201  $k_{1i} = k_1 V_i f_i(X)$  for  $i = act$  or  $inh$ . In the case where a gene X is regulated by multiple  
202 genes, we considered two scenarios, the first one is independent or additive (where  
203 we sum the regulators' Hill functions) and the second scenario is synergistic or multi-  
204 plicative (where we take the product of the regulators' Hill functions). By allowing a  
205 gene to have multiple regulators, we considered three types of *combination reactions*  
206 which we refer to as combined activation, combined inhibition and combined action.  
207 Combined activation refers to the case where all regulators are activating the gene,  
208 combined inhibition refers to the case where all regulators are inhibiting the gene  
209 and combined action refers to the case where some of the regulators activate the gene  
210 and some of them inhibit the gene.

For example, if Y activates X and Z inhibits X then the transcription rate of X becomes in the multiplicative case (multiplicative combined action)

$$k_{1i} = k_1 V_i f_{act}(Y) f_{inh}(Z),$$

or can be written for the additive case (additive combined action) as follow

$$k_{1i} = k_1 V_i (f_{act}(Y) + f_{inh}(Z)).$$

## 2.2 Parameters for mammalian cells

In [54], the authors simultaneously measured absolute mRNA and protein abundance and turnover by parallel metabolic pulse labelling for more than 5000 genes in mammalian cells and reported data for protein and mRNA numbers as well as half-lives, transcription and translation rates. To select realistic parameters for accurate GRN simulations, we fitted multivariate Log Normal distributions to data extracted from the aforementioned study using maximum likelihood estimation technique and presented the results in Figure 2. Samples of Protein decay, transcription and translation rates are presented in Figure 2 panels (B), (C) and (D) respectively. We found little correlation between any of the parameters and that the marginal distributions are positively skewed meaning that the majority of the data consists of lower values and the majority of outliers are higher values. To avoid computations taking too long, we also excluded parameter sets that resulted in protein numbers greater than 100,000.

Furthermore, we constrained the choice of the remaining parameters to be realistic and in accordance with experiments. Cell numbers were uniformly sampled from [2000, 3000] which is consistent with typical scRNA-seq experiments [55]. We note that breakthroughs in technology have allowed even higher numbers of cells to be studied [56]. The cell growth rate was fixed to correspond to a 50 hours doubling time, though we note that we tried a range of doubling times between 24 and 50 hours, which is consistent with mammalian cell doubling times but did not find any consequence for network inference performance. The Hill coefficient  $n$  was sampled from a log uniform distribution with lower bound 1 and upper bound 10 and the microscopic dissociation constant  $K$  was chosen to be proportional to the mean value of the steady-state of the regulator in absence of regulation. Finally, we note that the exponent of the power-law degree distribution was sampled from the uniform distribution with bounds [2, 3], which is consistent with [57]. For reproducibility

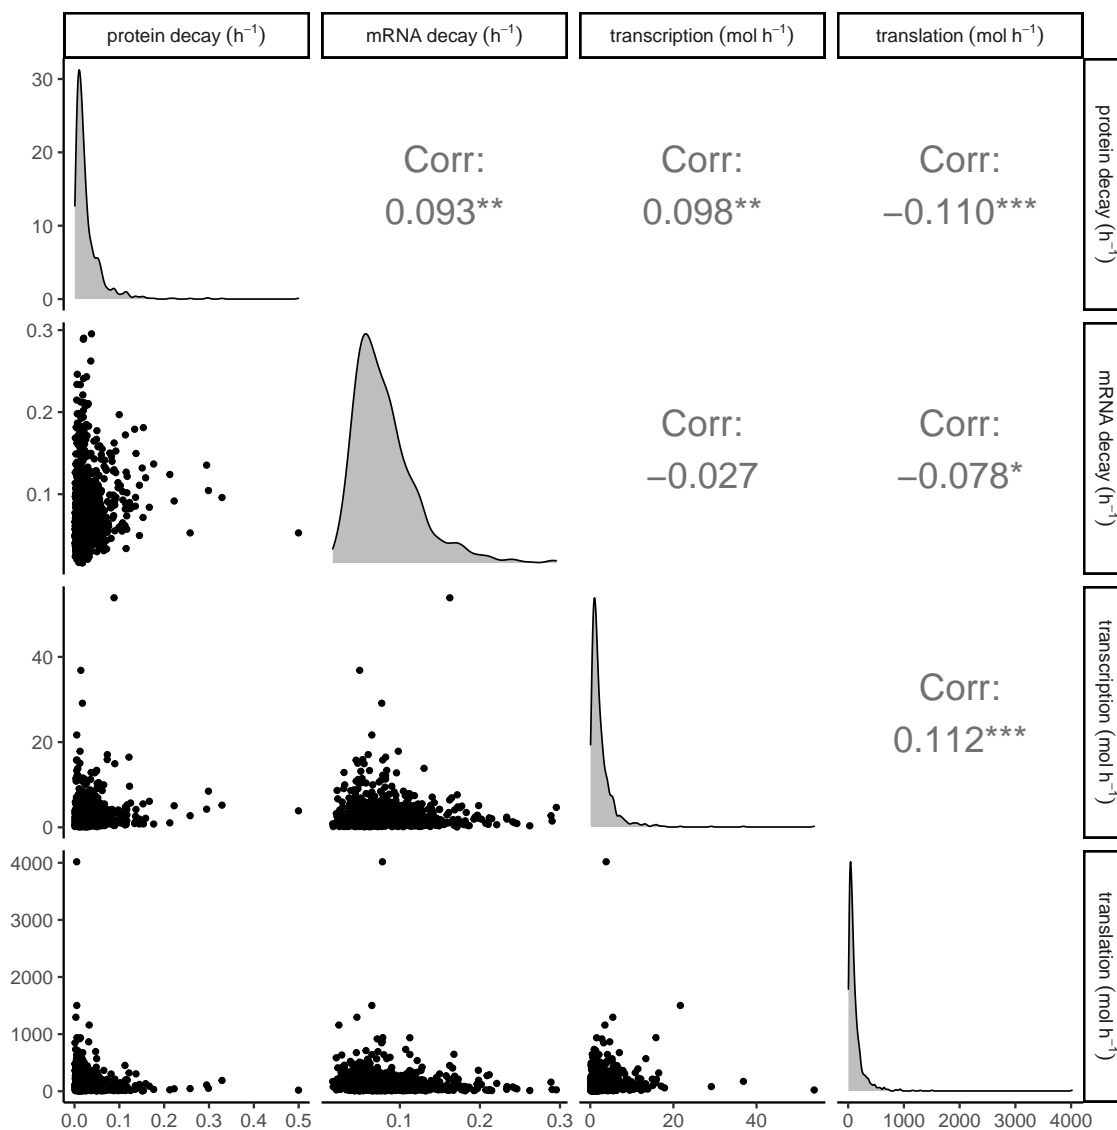

Figure 2: Density plots, scatter plots and correlations of 1000 parameter sets sampled from a multivariate normal distribution fitted to experimental data [54]. Diagonals show distributions of protein decay rates, mRNA decay rates, transcription and translation rates respectively. Lower left scatter plots show relationships between parameter values and upper right plots show Pearson correlation values.

238 purposes, a list of the 100 parameter sets used can be found here\* <sup>2</sup>.

<sup>2</sup><https://github.com/ayoublasri/Biomodelling.jl/tree/master/parameters>

## 239 2.2.1 Cell population: growth, division and partitioning

240 Without loss of generality, cells were assumed to grow from approximately  $V =$   
241 1 at birth to  $V = 2$  at division with cell growth rates chosen to correspond to  
242 biologically feasible doubling times as explained above. Cell growth was modelled to  
243 be exponential

$$\frac{dV_i(t)}{dt} = \mu_i(t)V_i(t), \quad (1)$$

244 where  $\mu_i(t)$  is the growth rate at time  $t$  in cell  $i$ .

245 To model division noise we adopt the approach of [58, 59] where the final volume  
246 of the cell at generation  $n$  was found to follow a noisy linear map, i.e., the final  
247 volume  $V_F$  of a given cell was assumed to follow

$$V_F = aV_I + b + \eta_1, \quad (2)$$

248 where  $V_I$  is the initial volume of the cell,  $a$  and  $b$  are linear function parameters, we  
249 note that  $a$  and  $b$  have the same value for all cells, and  $\eta_1$  is the final volume noise.  
250 The value of parameter  $a$  defines the size control strategy of the cell. It is known that  
251 many cell types, including mammalian cells show a so-called adder behavior giving  
252 a value of  $a = 1$  [60]. For simplicity,  $\eta_1$  was set to 0 in this study. Given the value  
253 of  $a$  and the birth size of about  $V = 1$ , the value of  $b$  is also set to be 1.

254 A dividing cell of volume  $V_F$  is assumed to divide into two daughter cells with  
255 volumes  $V_{I_1}$  and  $V_{I_2}$  defined by

$$V_{I_1} = V_F \times \eta_2, \quad (3)$$

256 and

$$V_{I_2} = V_F \times (1 - \eta_2), \quad (4)$$

257 where  $\eta_2$  represents division noise and is sampled from  $\mathcal{N}(0.5, \sigma_2)$ . We assumed the

258 contents of the cell are binomially distributed (using  $\eta_2$ ) between daughter cells upon  
259 division [61]. We note that  $\eta_1$  and  $\eta_2$  embed both intracellular stochastic phenomena  
260 and also the stochastic influence of extracellular signals. As in [62, 63, 64], in order  
261 to keep the population size capped, after a cell division event the new offspring  
262 displaces another cell in the population picked at random. Simulating a capped  
263 sized population is computationally cheaper than simulating a growing population  
264 and leads to more accurate results than using an isolated lineage based approach  
265 [65].

266 To couple the reactions with the exponential growth equation, we ran the stochas-  
267 tic simulation algorithm for a fixed time step before updating the volumes of cells  
268 and checking for cell division. This was typically set to  $\tau = 0.1$  h but we note that we  
269 tried smaller time steps as far as  $\tau = 0.01$  h and found no observable consequences  
270 on the simulation output.

### 271 **2.2.2 Genes tracking and ground truth data**

272 Following the modelling approach described above, genes in the regulatory network  
273 were tracked for a given simulation time and data were saved in typical scRNA-seq  
274 format (where rows represent genes and columns represent cells). We refer to these  
275 data as ground truth (GT) data. In addition, our modelling approach does not only  
276 simulate gene expression, it also tracks protein levels in a single cell and stores cell  
277 volumes (which are used in data scaling).

## 278 **2.3 Downsampling, scaling and imputation**

279 Given a GT data set and in order to mimic scRNA-seq experiment, as in [19, 66]  
280 we assume that the number of transcripts observed in a cell  $j$  follows a Binomial  
281 model with probability  $\beta_j$  (the cell's specific capture efficiency), which represents  
282 the probability of original transcripts in a cell being captured by the sequencing

283 method [66]. In order to simulate downsampling of GT data, the cells' specific  
284 capture efficiencies were obtained from a log-normal distribution centred in  $\beta$ , where  
285  $\beta \in \{0.03, 0.1, 0.2, 0.3, 0.5\}$ , with a variance set to 0.2, this is consistent with values  
286 reported in [67]. The downsampled data from a given capture efficiency  $\beta$  is referred  
287 to as noisy data (ND- $\beta$ ).

In order to perform data scaling, we define the scaling factor ( $\theta$ ) for a cell  $i$  as follows

$$\theta_i = \beta_i \times \frac{V_i}{V_{max}},$$

288 where  $V_i$  is cell  $i$  volume,  $V_{max}$  is the maximum volume in the cell population and  
289  $\beta_i$  is cell  $i$  capture efficiency. The scaled data (SD- $\beta$ ) are obtained by dividing the  
290 noisy data by the cell's specific scaling factor. Our scaling approach is similar to a  
291 global-scaling normalisation strategy, where the expected value of the read count for  
292 a gene in a cell is proportional to a gene specific expression level and a cell specific  
293 scaling factor [68]. The cell specific scaling factor in the data will be proportional to  
294 the cell size and cell specific capture efficiency, which motivates the form chosen for  
295  $\theta$ . In the following we describe, briefly, the imputation methods that are considered  
296 in this study.

297 bayNorm [19] is a Bayesian approach to perform imputation. bayNorm gener-  
298 ates for each gene in each cell a posterior distribution of original expression counts,  
299 given the observed scRNA-seq read count for that gene and the cell specific capture  
300 efficiency assuming a binomial model for transcript capture in the RNA-seq process.  
301 The resulting posterior distribution of the original counts relied on empirical based  
302 method of estimating a prior on each gene by pulling information across all cells. To  
303 perform imputation on ND- $\beta$ , we used *bayNorm()* function from bayNorm R package  
304 (v1.6.0). The output data are referred to as BD- $\beta$ .

305 MAGIC [18] shares information across similar cells, via data diffusion, to fill in  
306 missing transcripts. This is achieved in four steps: (i) building a nearest neighbor



307 graph based on cell–cell expression distance, (ii) defining an affinity matrix by ap-  
308 plying a Gaussian kernel on the principal components of the graph, (iii) applying a  
309 diffusion process on the similarity matrix to obtain a smoothed affinity matrix, (vi)  
310 computing the new expression of each gene as a linear combination of the same ex-  
311 pression in similar cells, weighted by the similarity strength obtained in the previous  
312 steps. To perform imputation on ND- $\beta$ , we used *magic()* function from Rmagic R  
313 package (v2.0.3). The output data are referred to as MD- $\beta$ .

314 SAVER [14] pools information across genes and cells to provide accurate expres-  
315 sion estimates for all genes and impute the missing values. SAVER assumes that the  
316 count of each gene in each cell follows a Poisson–gamma distribution mixture. The  
317 Poisson distribution approximates the technical noise, whereas the uncertainty in the  
318 true expression is modelled as a gamma distribution. The recovered expression is a  
319 weighted average of the normalized observed counts and the predicted true counts.  
320 To perform imputation on ND- $\beta$ , we used *saver()* function from SAVER R package  
321 (v1.1.2). The output data are referred to as SAD- $\beta$ .

322 We refer the reader to [69], a recently published review and benchmarking study  
323 that assesses performance, the code quality and the computational time for the above  
324 mentioned methods.

## 325 **2.4 Network inference algorithms**

326 We consider four different methods: Information Measurement (PIDC) [9], Empirical  
327 Bayes (EB) [70], Context Likelihood of Relatedness (CLR) [9], and GENIE3 [71],  
328 see Figure 1(II). The overall workflow of the aforementioned methods focuses on  
329 modelling the relationship between genes using different correlation metrics.

330 PIDC and EB were developed by the same authors with EB presented as an  
331 improvement of PIDC. Both methods use partial information decomposition (PID)  
332 as follows: (i) compute the mutual information between two genes X and Y and

333 the unique mutual information between X and Y given a third gene Z, (ii) define  
334 the proportional unique contribution (PUC) between two genes X and Y as the  
335 sum of the ratio of unique to mutual information calculated using every other gene  
336 Z in a network, (iii) an empirical probability distribution is estimated from the  
337 PUC scores for each gene, and the confidence of an edge between a pair of genes is  
338 given . EB provides an additional step to smooth the empirical distributions using  
339 a regression-based mode-matching method. The methods output a ranked list of  
340 undirected edges using the confidence scores obtained. The Julia implementation  
341 of these methods was used: *InformationMeasures.jl* (v0.3.1), *NetworkInference.jl*  
342 (v0.1.1) and *EmpiricalBayes.jl*

343 CLR computes the mutual information between two genes and calculates the sta-  
344 tistical likelihood of each mutual information value within its network context. Then,  
345 the pairwise genes mutual information is compared to the background distribution of  
346 mutual information scores for all possible gene pairs. The most probable interactions  
347 are those whose mutual information scores stand significantly above the background  
348 distribution of mutual information scores. The Julia implementation of this method  
349 in the following packages *InformationMeasures.jl* (v0.3.1) and *NetworkInference.jl*  
350 (v0.1.1) was used.

351 Originally developed for bulk RNA-seq and best performer in the Dialogue for  
352 Reverse Engineering Assessments and Methods (DREAM4) challenge, GENIE3 is  
353 widely applied to scRNA-seq. Unlike many methods in the same category that look  
354 at gene pairs or gene triplets, GENIE3 takes into account the interaction of an arbi-  
355 trary number of genes in one calculation and can capture the nonlinear dependencies  
356 between genes by decomposing the prediction of a regulatory network between p  
357 genes into p different regression problems. Although GENIE3 can return a directed  
358 network, for the sake of comparison with the other methods, we considered the  
359 undirected network option. We used *GENIE()* function from GENIE3 R package

360 (v1.10.0).

361 As control we also report random inference (RAND), which returns for a given  
362 sparsity random links in the GRN. We note that in this systematic study we matched  
363 the network's sparsity to the inference method algorithms' threshold, meaning that  
364 if for a given sparsity the GT network has N links, we chose the inference algorithms'  
365 threshold that returns the top N predicted links.

366 We refer the reader to [11], a recently published review that assesses the code  
367 implementation and usability and the computational time of the above mentioned  
368 methods, with the exception of CLR.

## 369 **2.5 Network inference performance evaluation**

370 To evaluate the network inference algorithms performance, we consider two metrics:  
371 Area Under Receiver Operating Characteristic curve (AUROC) [72] and Area Under  
372 Precision-Recall curve (AUPR) [73], see Figure 1(III).

The ROC curve is defined as a plot of False Positive Rate (FPR) versus True Positive Rate (TPR) (also known as sensitivity or recall) which are given in function of True Positive (TP), True Negative (TN), False Positive (FP) and False Negative (FN) as follow

$$FPR = \frac{FP}{FP + TN},$$
$$TPR = \frac{TP}{TP + FN}.$$

373 The AUROC is then easily obtained from the ROC curve, many options are available,  
374 we used *AUC()* function from DescTools R package (v0.99.39) that takes as input the  
375 ROC curve and the method to compute the area, we chose *'trapezoid'*. AUROC is  
376 characterised by the absence of bias toward models that perform well on the minority  
377 class at the expense of the majority class, in other words AUROC does not favour  
378 methods that are good at identifying interactions between genes while failing to

379 detect the absence of interactions [74].

The PR curve is defined as a plot of TPR against Precision (P) which is given as

$$P = \frac{TP}{TP + FP}.$$

380 The AUPR is obtained from PR curve using  $AUC()$  function as described above.

381 Using AUPR we are able to assess the performance of a method on the minority

382 class, in other words, since the gene regulatory networks are sparse, we can assess

383 the performance of a given method on how it does in detecting existing interactions

384 between genes [74].

## 385 **3 Results**

### 386 **3.1 Synthetic scRNA-seq data for a toy example: unscaled** 387 **expression leads to uniformly high and positive correla-** 388 **tions**

389 We used the pipeline described in Figure 1 to investigate different scenarios for  
390 network inference. We begin in this section by presenting a toy example using our  
391 method of synthetic scRNA-seq data generation (Figure 1). This example serves to  
392 show typical output of our simulation pipeline and also illustrates the difficulties of  
393 performing accurate network inference using scRNA-seq data.

394 While we only make use of the final time point for mRNA and cell volume in this  
395 study (as scRNA-seq is obtained in a time snap-shot), we present plots of the full  
396 volume time series for a single cell along with the corresponding levels of mRNA and  
397 protein in Figure 3A-C. For initial conditions we chose the steady state mean value  
398 of mRNA and protein species in the absence of any regulation. Furthermore, by  
399 using only the final time point for network inference, we ensured all simulated cells  
400 are uncorrelated from the initial condition. As we made clear in Methods section 2.2  
401 our choice of parameters such as cell doubling time, transcription, translation and  
402 decay rates keep the mRNA and protein numbers within biologically feasible levels  
403 for mammalian cells. However, we note that our approach can also be adapted for  
404 any other cell type by using different parameterisations.

405 In Figure 3D, we show gene-gene correlations computed from the cell population  
406 at the final time point across the 5 genes. Strikingly we found that without scaling  
407 the raw mRNA copy numbers by cell volume, gene correlations are dominated by  
408 cell volume (see Figure 3D). This is because gene expression scales with cell size and  
409 therefore mRNA levels for different genes therefore have a global positive correlation  
410 due to cell size scaling. Hence any correlations due to activations or inhibitions are

411 obscured by the cells position in the cell cycle. This information can be retrieved by  
412 dividing the raw mRNA copy numbers by the cell volumes (as shown in Figure 3E).  
413 Inspecting Figure 3E we can observe a strong positive correlation between gene 1  
414 and gene 2 and a strong negative correlation between gene 3 and gene 4. This is  
415 consistent with what we would expect from the ground truth network (illustrated in  
416 Figure 3G). While, most scRNA-seq protocols do not measure cell size (see [6] for an  
417 exception), one can correct for cell size scaling in real scRNA-seq data by normalising  
418 by total transcript counts per cell, which is expected to scale with cell size [6].

419 Drop-out events are one of the most important features of single cell data. While  
420 their technical origin is hotly debated, the evidence for zero-inflation has been ques-  
421 tioned as the statistics of drop-out events are consistent with a simple model of  
422 binomial capture of original transcripts during scRNA-seq protocols [19]. To investi-  
423 gate the effect of drop-outs, We next artificially induced drop-out events to the final  
424 mRNA data (before scaling by final cell volume). We downsampled our data using  
425 a Binomial distribution with capture efficiency of 20%, see Methods section 2.3 for  
426 more details. This approach is similar to the method used to generate single cell sim-  
427 ulation data for network evaluation that was published recently [75]. As shown in  
428 Figure 3F downsampling in this manner removes a significant level of the correlation  
429 information.

430 Finally, we present two network inference results. In Figure 3(H) we show the  
431 network inferred using the PIDC algorithm with the final mRNA data divided by  
432 final cell volume as input. We selected the threshold parameter to be equal to the  
433 sparsity of the network (as we do for the rest of the results presented in this paper).  
434 We show in Supplemental Figure 1 that this is the most appropriate parameter  
435 choice. By making this choice we focus our study on the impact of imputation on  
436 inference accuracy rather than the choice of inference algorithm parameters. We  
437 note that in applications to real data, of course the true sparsity will not be known

438 and a best guess should be used. For this simple toy example, we can see that  
439 PIDC identified the whole network correctly (comparing Figure 3(H) and (I)). We  
440 note that this network is not representative of a real biological network due to its  
441 small size. However as shown in Figure 3(I) even in this simple case downsampling  
442 the data affects the results significantly and PIDC no longer predicts any correct  
443 links. Hence, we observe that downsampling of the data that is associated with low  
444 capture efficiency and drop-out in scRNA-seq data represents a challenge for network  
445 inference. In the following, we investigate this issue systematically in bigger networks  
446 and ask if imputation methods could help to resolve this challenge.

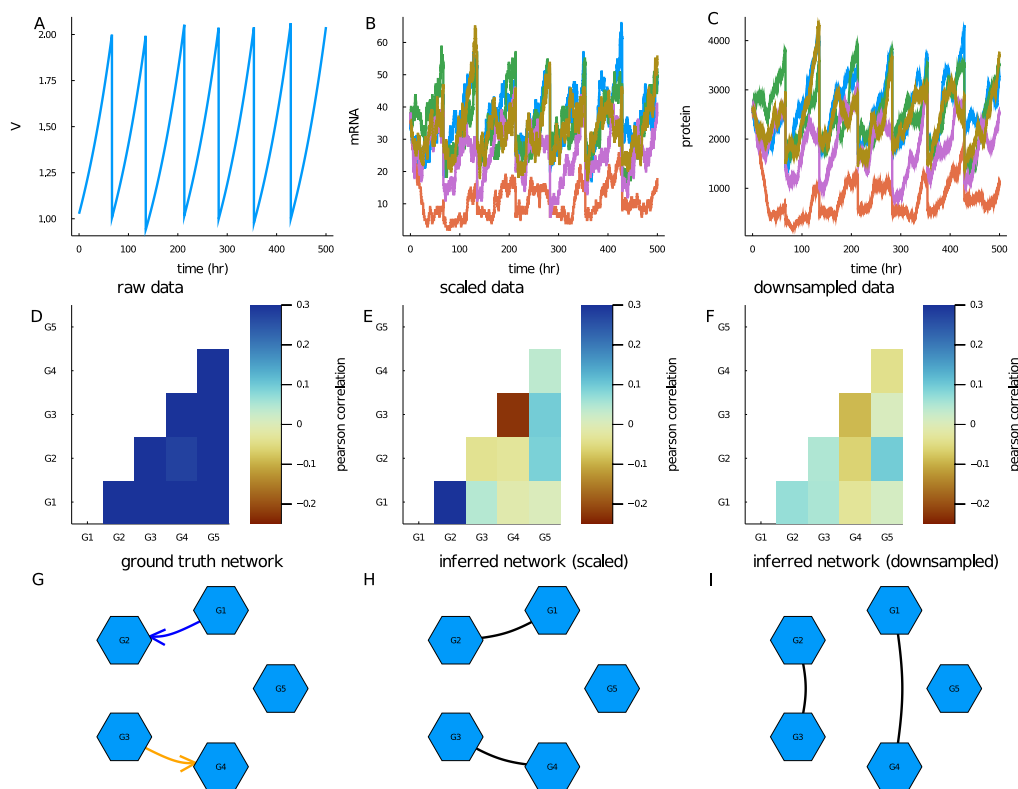

Figure 3: Synthetic scRNA-seq data generated for 5 gene network example. The network was simulated using 500 cells over a 500 hour time period with parameters sampled as described in Methods section 2.2. (A) Plot of the volume time series of a single representative cell. Early divisions are due to replacement in order to keep number of tracked cells constant. (B) Plot of corresponding mRNA time series for the 5 genes modelled. (C) Plot of corresponding protein time series for the 5 genes modelled. (D) Heatmap of mRNA pearson correlations taken from final time point. (E) Heatmap of mRNA pearson correlations scaled by cell volume taken from final time point. (F) Heatmap of mRNA pearson correlations scaled by cell volume and subsequently downsampled using Binomial downsampling with 20% capture efficiency. (G) Graph of ground truth network where a blue arrow represents a link with an activating reaction and an orange arrow represents a link an inhibiting reaction. (H) Graph of inferred reaction network obtained from PIDC algorithm using mRNA data scaled by cell volume at final time point as input. Predicted links are represented by solid black lines. (I) Graph of inferred reaction network obtained from PIDC algorithm using mRNA data scaled by cell volume at final time point and downsampled (using Binomial downsampling with 20% capture efficiency) as input. Predicted links are represented by solid black lines.



## 447 **3.2 Network inference algorithms tend to perform better for** 448 **sparser networks**

449 In this section we present the performance of 4 commonly used network inference  
450 algorithms using ground truth data (i.e., no downsampling is performed) as input  
451 from 100 different simulated networks with 20 genes. Each network was randomly  
452 sampled in terms of the links generated, number of cells and parameter values used.  
453 For simplicity, we limited the number of links between genes to at most one (i.e.,  
454 we use a ROR network topology, see Methods section 2.1.1). Though this case is  
455 biologically infeasible, we used this to gauge the best case performance of the different  
456 algorithms and focus on the impact of network sparsity on network inference. The  
457 sparsity parameter relates to the number of links in the network, where a larger  
458 parameter leads to more links. We considered network sparsities that correspond to  
459 5, 10 and 19 links present in the network (out of a possible 190). We present the  
460 results of commonly used network inference metrics in Figure 4.

461 Our first observation is that in general all 4 network inference algorithms perform  
462 significantly better than the random classifier (across all measures considered). In  
463 terms of ranking, for this data set, it appears that GENIE3 performs the best, fol-  
464 lowed by PIDC then CLR and finally Empirical Bayes. This is consistent with other  
465 studies where it was found that GENIE3 has the best network inference performance  
466 for many different data sets [39].

467 With respect to the GENIE3 algorithm, we observed no clear relationship between  
468 the AUROC score and network sparsity (Figures 4A). Similarly, we see that the  
469 AUPR score stays relatively constant with respect to sparsity (Figures 4B). However,  
470 we noticed a clear trend regarding the number of true positives (Figures 4C) versus  
471 network sparsity. As the sparsity parameter is increased, while the number of true  
472 positives increases, the overall fraction of average correctly identified true positives  
473 decreases (0.8, 0.6, 0.47 for 0.025, 0.05 and 0.1 sparsities respectively). We found a

474 similar trend for the false positives and false negatives (Figures 4E and F) while the  
475 true negatives decrease with increasing sparsity parameter (Figures 4D). We note  
476 also that the variance in the number of true positives, true negatives, false positives  
477 and false negatives increases with sparsity, implying GENIE3 is less reliable for larger  
478 sparsity values.

479 We next considered the PIDC and CLR algorithms which perform similarly in this  
480 case. In contrast to the GENIE3 algorithm, we observed an increase in the AUROC  
481 score for both these algorithms as the sparsity is increased (Figure 4A). The AUPR  
482 score did not change with sparsity (Figure 4B) and the number of true positives  
483 increases with sparsity (while the overall fraction of average correctly identified true  
484 positives decreases) for both algorithms (Figure 4C). We found a similar trend for  
485 the false positives and false negatives (Figures 4E and F) while the true negatives  
486 decrease with increasing sparsity parameter (Figures 4D). We note that the CLR  
487 algorithm appears to have a constant variance for the number of true positives, true  
488 negatives, false positives and false negatives for the different sparsities considered  
489 while the same metrics for the PIDC algorithm increases in variance for the highest  
490 sparsity.

491 Unlike the other algorithms considered, Empirical Bayes produces similar trends  
492 for both the AUROC and AUPR scores with both increasing with the sparsity param-  
493 eter. For the lower sparsities considered (0.025, 0.05), the number of true positives,  
494 true negatives, false positives and false negatives is similar to the random classifier.  
495 However, for the largest sparsity (0.1) the Empirical Bayes algorithm improves upon  
496 the random classifier but with very large variance.

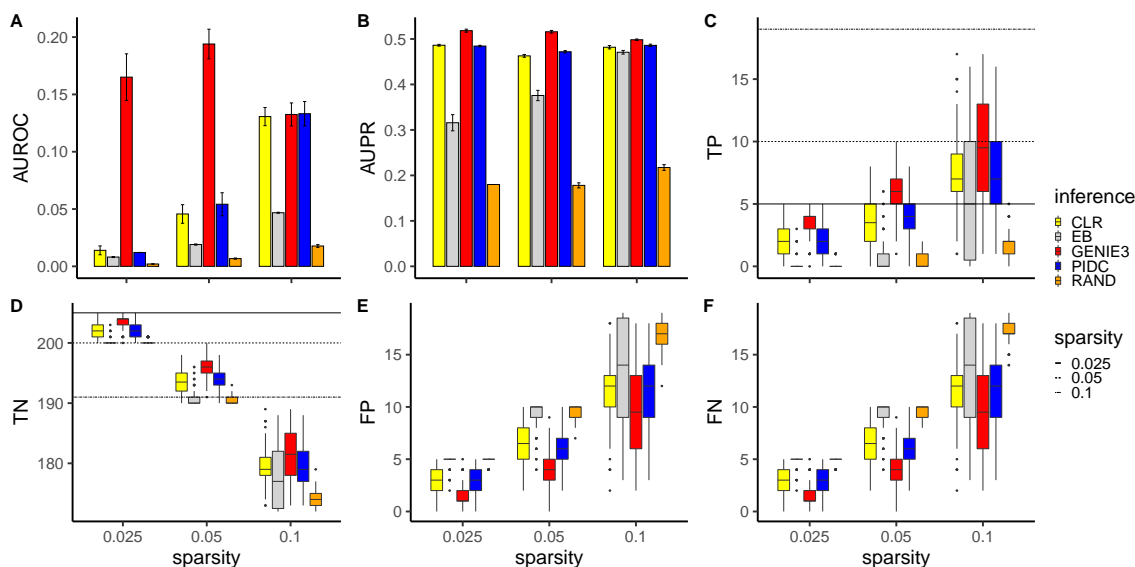

Figure 4: Network inference results using ground truth data (without downsampling) from 100 different simulated random one regulation networks with 20 genes for 3 different network sparsities. Each network was simulated over 500 hours using parameters sampled as described in Methods section 2.2. (A) shows a barplot of the AUROC score for the 4 different network inference algorithms considered as well as a random classifier (RAND). (B) shows a barplot of the AUPR score for the 4 different network inference algorithms considered as well as a random classifier. Confidence intervals for barplots were computed by subsampling 35 out of 100 networks 100 times. (C) shows a boxplot of the true positives found for each network inference algorithm and random classifier for 3 different sparsity levels. The horizontal lines depict the actual number of true positives for reference. (D) shows a boxplot of the true negatives found for each network inference algorithm and random classifier for 3 different sparsity levels. Again, the horizontal lines depict the actual number of true negatives for reference. (E) shows a boxplot of the false positives found for each network inference algorithm and random classifier for 3 different sparsity levels. (F) shows a boxplot of the false negatives found for each network inference algorithm and random classifier for 3 different sparsity levels.

### 497 3.3 Scale-free topologies are challenging for accurate net- 498 work inference

499 Here we build on the previous sections by considering realistic scale-free topologies.  
500 In this case, since more than one link can be made between genes (we allow up to 4  
501 genes to activate/inhibit another gene) using scale-free topologies, we must consider  
502 how this regulation occurs. To explore this, we considered two different kinds of

503 regulation, multiplicative or additive (for details see Methods section 2.1.1). We  
504 present the results of multiplicative versus additive regulation in Figure 5.

505 Overall, we found the performance is poorer compared to the ROR network  
506 topologies results presented in Figure 4, i.e., the results were closer to the ran-  
507 dom classifier for all algorithms considered. This is due to the scale-free nature of  
508 the networks considered as we found very little difference in the performance of the  
509 networks produced using additive versus multiplicative regulation. Both forms of  
510 regulation display the inverse relationship between the network sparsity parameter  
511 and accuracy that we observed in the previous section. This inverse relationship is  
512 also reflected in the AUPR scores in Figures 5B and F. Interestingly, the AUROC  
513 scores show an opposite trend for additive and multiplicative regulation, with the  
514 AUROC score increasing for higher sparsities (apart from the GENIE3 algorithm  
515 for multiplicative regulation). We also highlight that the overall ranking of the net-  
516 work inference algorithms were preserved from the ROR case, with GENIE3 again  
517 performing the best, followed by PIDC, CLR then Empirical Bayes (which is only  
518 slightly better than random classification). While the overall accuracy is diminished  
519 from the ROR case, the results appear more robust (i.e., the variance is decreased).

520 Due to inconsistencies we observed using the common AUROC and AUPR scores,  
521 we use an easier to interpret score, the precision, for the remainder of the paper. Since  
522 we fix the threshold used in the network inference algorithms to the sparsity of the  
523 network, the precision can be interpreted simply as the fraction of correctly identified  
524 true positives.

### 525 **3.4 Different imputation methods perform better for differ-** 526 **ent network inference methods**

527 To address the question of which imputation method is best for the purpose of ac-  
528 curate network inference we generated synthetic scRNA-seq data for 100 scale-free

529 network topologies using 20 genes. For simplicity, we only present results for the  
530 middle sparsity case from previous sections (i.e., sparsity = 0.05 or 10 out of 190  
531 possible reactions have links) and use multiplicative regulation (since both additive  
532 and multiplicative regulation gave similar results). To reflect real scRNA-seq data,  
533 we downsampled our data using capture efficiencies that reflect current technologi-  
534 cally possible average capture efficiencies [76]. We present the results as boxplots in  
535 Figure 6 where the first row corresponds to the precision scores for different network  
536 inference algorithms using different imputation methods.

537 Overall we found that no imputation method is able to completely recapitulate  
538 the network inference results obtained using the ground truth data. There is also  
539 a general trend where as the capture efficiency decreases, the performance of the  
540 network inference decreases, with no network inference method/imputation method  
541 combination improving upon random classification for capture efficiencies less than  
542 10%. Another general trend we notice is that MAGIC and SANITY imputation  
543 methods lead to very poor network inference accuracy for all network inference meth-  
544 ods studied and all capture efficiencies. We also note that the SANITY imputation  
545 algorithm failed to converge for capture efficiencies lower than 30%. We also high-  
546 light that we ordered the results on the x-axes by average score and highlight that  
547 ‘downsampled’ corresponds to no imputation performed, hence every method to the  
548 right of ‘downsampled’ is beneficial for inference.

549 Inspecting each individual network inference algorithm, we found that no one im-  
550 putation method works best for every network inference algorithm. In Figure 6A we  
551 observe that the SAVER imputation method works best on average when combined  
552 with the PIDC algorithm with scaled data and bayNorm performing very similarly.  
553 For the CLR algorithm, bayNorm performs best on average, followed closely by  
554 SAVER (see Figure 6B). For GENIE3 which produces the best ground truth perfor-  
555 mance, scaled data gives the best results followed by bayNorm (see Figure 6C). Re-

556 markably for the 50% capture efficiency scaled case, there is a single network which  
557 is inferred exactly. Figure 6D shows the Empirical Bayes algorithm results which  
558 works best when combined with SAVER imputation, though it should be noted that  
559 even for ground truth data Empirical Bayes performance is only marginally better  
560 than random classification.

561 We next investigated how well different imputation methods preserved gene-gene  
562 correlations. To do this we first computed gene-gene Pearson correlations in the  
563 ground truth data for the 100 synthetic scRNA-seq data sets. We then computed  
564 the corresponding Pearson correlations for various imputation methods for different  
565 capture efficiencies. We show one such example for each imputation method and  
566 for three different capture efficiencies in Supplemental Figure 2. From this figure  
567 we see a general trend where the gene-gene correlations become less correlated with  
568 the ground truth data as the capture efficiency was decreased. We can also notice  
569 a pattern emerging with inhibition reactions (highlighted in grey) being less well  
570 preserved than other reaction types. We also noticed that the SAVER imputation  
571 method seemed to artificially inflate correlations. To test these observations more  
572 robustly, we computed the mean squared deviation between gene-gene correlations  
573 obtained using the ground truth data and those obtained using various imputation  
574 methods for all 100 data sets. We present these mean squared deviations as boxplots  
575 in the second row of Figure 6.

576 In general, the bayNorm imputation method preserved the gene-gene correlations  
577 best (see Figure 6E). The only other method improving on 'downsampled' was the  
578 scaled method which performed similarly well. MAGIC, SANITY and SAVER per-  
579 formed poorly in preserving gene-gene correlations, however SAVER appeared to  
580 improve with increasing capture efficiency. In Figure 6F we show the mean squared  
581 deviations found using only activation type reactions, and here we found that only  
582 bayNorm improves over the gene-gene correlations found using the downsampled

583 data. We also observed that SAVER and MAGIC do not improve in performance  
584 with increasing capture efficiency for activation type reactions. In Figure 6G, we  
585 show that the scaled method performed best at preserving gene-gene correlations of  
586 inhibition type reactions, followed closely by bayNorm which also improved upon  
587 the downsampled data. Finally we observed that bayNorm is best at preserving  
588 gene-gene correlations for non-reactions (see Figure 6H).

### 589 **3.5 Overall performance of network inference algorithms is** 590 **inversely related to number of combination reactions** 591 **considered**

592 To examine the impact of the number of genes on overall network inference per-  
593 formance, in this section we extended the size of the networks analysed from 20 to  
594 50 gene networks. We used sparsities such that the fraction of links present in the  
595 network were consistent with the 20 gene case from previous sections. This also  
596 prevented the maximum degree of the network from exceeding the maximum of 4  
597 which is currently supported in Biomodelling.jl. We present the results for spar-  
598 sity = 0.02 as boxplots in Figure 7, as in the previous section, where the first row  
599 corresponds to the precision scores for different network inference algorithms using  
600 different imputation methods.

601 We found a general deterioration in the performance of all network inference  
602 algorithms with the medium sparsity for the 50 gene case performing worse than  
603 medium sparsity for the 20 gene case (compare Figure 7A to D with (Figure 6A  
604 to D). While GENIE3 still performed the best overall, CLR performed better than  
605 PIDC in this case. Empirical Bayes was found again to be only marginally better  
606 than random classification. In terms of imputation methods, we found that SAVER  
607 worked best when combined with PIDC or Empirical Bayes and the scaled method  
608 worked best for CLR or GENIE3 algorithms. This is broadly consistent with the 20

609 gene case.

610 Surprisingly, the gene-gene correlations are very closely aligned with the 20 gene  
611 case (compare Figure 7E to H with Figure 6E to H), even for different reaction types.  
612 This implies that the source of the deterioration in network inference is elsewhere. To  
613 further investigate this, we also examined the number of combination reactions (see  
614 Methods section 2.1.1 for details). We present the number of combination reactions  
615 for the 20 gene and 50 gene cases in Supplemental Figure 6. We found a significant  
616 increase in the total number of combination reactions in the 50 gene case versus  
617 the 20 gene case. Furthermore, we found that if we approximately matched the  
618 number of combination reactions for different number of genes (e.g. 0.02 sparsity for  
619 the 50 gene case and 0.1 sparsity for the 20 gene case) we observed a very similar  
620 performance (compare Supplemental Figure 7). Hence, this implies that it is not the  
621 gene number that dictates the overall performance but the number of combination  
622 reactions present in the network.



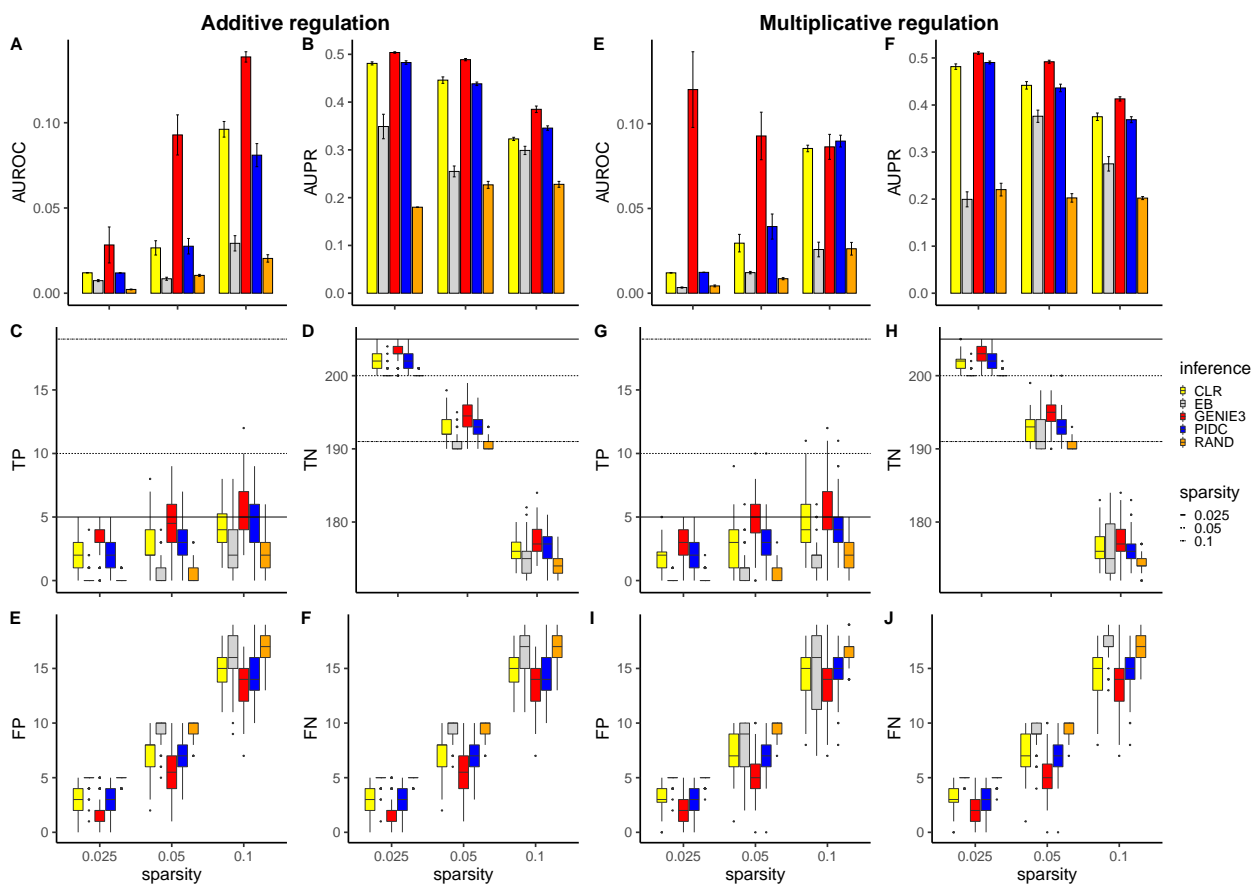

Figure 5: Network inference results using ground truth data (without downsampling) from 100 different simulated scale-free networks with 20 genes for 3 different network sparsities using additive or multiplicative regulation. Each network was simulated over 500 hours using parameters sampled as described in Methods section 2.2. (A) and (E) show barplots of the AUROC score for the 4 different network inference algorithms considered as well as a random classifier (RAND) for additive and multiplicative regulation respectively. (B) and (F) show barplots of the AUPR score for the 4 different network inference algorithms considered as well as a RAND classifier for additive and multiplicative regulation respectively. Confidence intervals for barplots were computed by subsampling 35 out of 100 networks 100 times. (C) and (G) show boxplots of the true positives found for each network inference algorithm and random classifier for 3 different sparsity levels for additive and multiplicative regulation respectively. The horizontal lines depict the actual number of true positives for reference. (D) and (H) show boxplots of the true negatives found for each network inference algorithm and random classifier for 3 different sparsity levels for additive and multiplicative regulation respectively. Again, the horizontal lines depict the actual number of true negatives for reference. (E) and (I) show boxplots of the false positives found for each network inference algorithm and random classifier for 3 different sparsity levels for additive and multiplicative regulation respectively. (F) and (J) show boxplots of the false negatives found for each network inference algorithm and random classifier for 3 different sparsity levels for additive and multiplicative regulation respectively.

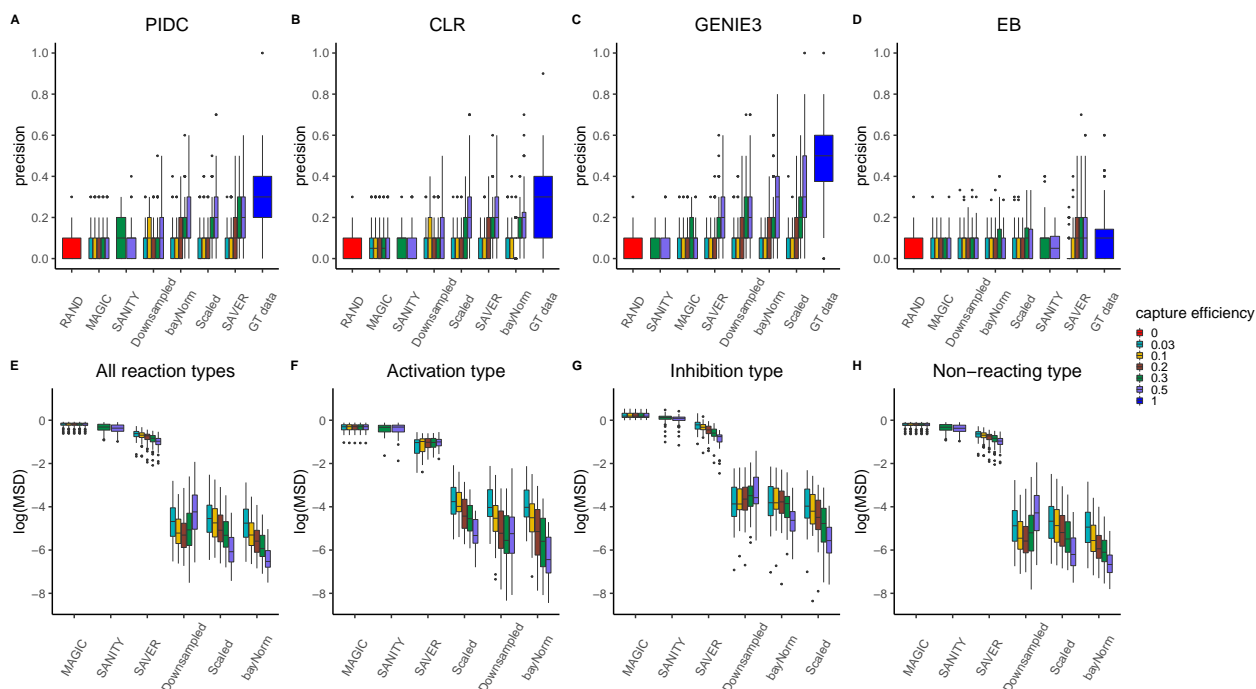

Figure 6: Impact of imputation on network inference performance and gene-gene correlation preservation for 100 different simulated 20 gene networks using sparsity = 0.05 with multiplicative regulation for various capture efficiencies. Figures (A) to (D) show boxplots of precision scores obtained for different imputation algorithms displayed on x-axes for PIDC, CLR, GENIE3 and Empirical Bayes respectively. RAND corresponds to precision obtained using random classification and GT data corresponds to precision obtained without downsampling (i.e., capture efficiency is set to 1). Figures (E) to (H) show the mean squared deviation between gene-gene correlations obtained using the ground truth data and those obtained using various imputation methods displayed on x-axes (with results plotted on a log-scale). Figure (E) show results obtained using all reaction types, while Figure (F), (G) and (H) show results obtained using only activation, inhibition and non-reacting type reactions respectively.

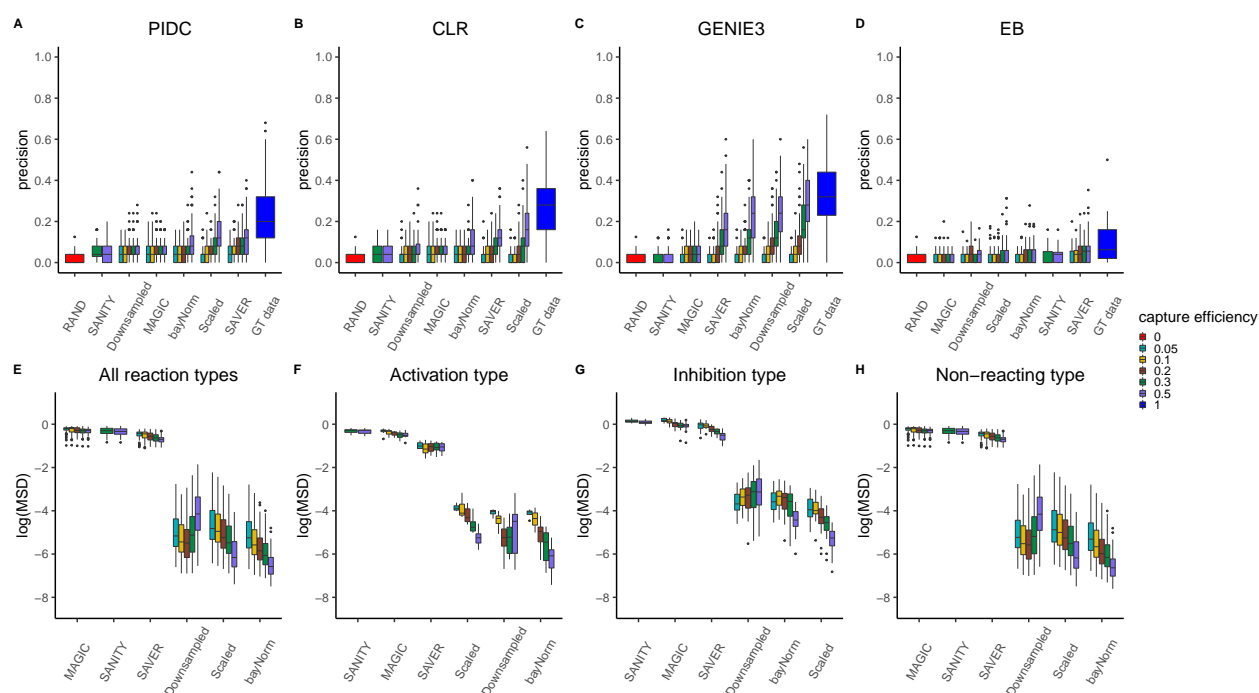

Figure 7: Impact of imputation on network inference performance and gene-gene correlation preservation for 100 different simulated 50 gene networks using sparsity = 0.02 with multiplicative regulation for various capture efficiencies. Figures (A) to (D) show boxplots of precision scores obtained for different imputation algorithms displayed on x-axes for PIDC, CLR, GENIE3 and Empirical Bayes respectively. RAND corresponds to precision obtained using random classification and GT data corresponds to precision obtained without downsampling (i.e., capture efficiency is set to 1). Figures (E) to (H) show the mean squared deviation between gene-gene correlations obtained using the ground truth data and those obtained using various imputation methods displayed on x-axes (with results plotted on a log-scale). Figure (E) show results obtained using all reaction types, while Figure (F), (G) and (H) show results obtained using only activation, inhibition and non-reacting type reactions respectively.

## 623 4 Discussion

624 Here we have introduced Biomodelling.jl, an open source julia package, for producing  
625 synthetic scRNA-seq datasets based on a known gene-regulatory network. Biomod-  
626 elling.jl simulates realistic stochastic gene expression coupled to cell size in growing  
627 and dividing population of cells using an agent-based approach. Downsampling using  
628 a binomial distribution is used to model capture efficiency and drop-out in scRNA-  
629 seq protocols. While there are other methods available for generating synthetic  
630 scRNA-seq datasets such as GeneNetWeaver and Splatter, these do not account for  
631 gene-gene correlations that arise due to an underlying gene regulatory network and  
632 cell growth. Hence, Biomodelling.jl can be used for benchmarking network inference  
633 methods. In this study, we investigated the effectiveness of imputation on recovering  
634 gene-gene correlations that are lost due to drop-out.

635 We first demonstrated the use of Biomodelling.jl by presenting results from a toy  
636 5 gene network example. This showed that to uncover true gene-gene correlations it  
637 was necessary to scale the raw mRNA numbers by cell volume, otherwise gene-gene  
638 correlations would be uniformly high and positive. Without scaling by cell volume,  
639 the mRNA numbers per cell for each gene are dominated by their position in the cell  
640 cycle. While, there are several methods that have been developed to remove cell cycle  
641 effects for scRNA-seq studies [77, 78, 79], we propose for the purpose of removing  
642 cell size effects one could use a total count normalisation. We matched the threshold  
643 parameter of the network inference algorithms with the sparsity of the network, as  
644 this yields the best performance and simplifies the interpretation of the performance.  
645 For this simple network, PIDC was able to correctly identify the whole network if  
646 the volume scaled mRNA data was used. However we found that drop-out events  
647 simulated by downsampling lead to poor network inference performance, implying  
648 even for very simple networks imputation may help. We note that in general the  
649 sparsity of network is not known, but we suggest the threshold could be derived

650 from the number of known transcription factors present in the considered network.

651 We then explored the performance of common network inference algorithms for  
652 simple topologies (ROR) using 20 genes network topologies. We found that all the  
653 network inference algorithms considered performed significantly better than random  
654 classification (apart from Empirical Bayes). Furthermore, GENIE3 performed best  
655 in this setting and sparser networks were generally easier to infer. Introducing scale-  
656 free topologies led to a general deterioration in the performance of the network  
657 inference algorithms but the overall ranking of the algorithms was retained from  
658 the ROR network topologies case. We also observed very little difference using  
659 additive or multiplicative regulation. Hence we decided to use multiplicative scale-  
660 free topologies for evaluating the impact of imputation methods on the performance  
661 of network inference algorithms.

662 We next examined the impact of performing imputation prior to applying the  
663 network inference algorithms for a range of experimentally feasible capture efficien-  
664 cies. In general we found that inference performance was inversely related to the  
665 capture efficiency regardless of imputation method used and that even for higher  
666 capture efficiencies the imputation methods were never able to completely recapitu-  
667 late the ground truth data case, though they frequently improved upon just using the  
668 downsampled data. The best choice of inference algorithm depended on the choice of  
669 imputation method, i.e., there was no one best imputation method for every network  
670 inference algorithm. Though we found clear evidence that some imputation methods  
671 should not be used for network inference. SAVER, bayNorm and the scaled method  
672 can be used depending on the choice of inference algorithm, for example SAVER and  
673 PIDC worked well together. We found that MAGIC and sanity imputation meth-  
674 ods never improved upon using the downsampled data for any network inference  
675 algorithms that we considered.

676 To better understand the network inference results we also examined how well

677 gene-gene correlations were preserved using several imputation methods. Overall, we  
678 found that bayNorm was the best at preserving the gene-gene correlations found in  
679 the ground truth data. We also examined the gene-gene correlations for specific reac-  
680 tion types. Only bayNorm performed better than downsampled data for activation  
681 type reactions, while bayNorm and the scaled method performed better than down-  
682 sampled data for inhibition and non-reacting type reactions. The fact that SAVER  
683 performs so poorly here is inconsistent with the performance we found for network  
684 inference. Therefore we examined this further, and while the gene-gene correlations  
685 are in general higher than the ground truth gene-gene correlations, we found that  
686 they are off by a constant (approximately the median correlation). In other words,  
687 the overall order or ranking of correlations is preserved which may explain why the  
688 network inference algorithms such as PIDC worked well with SAVER.

689 We also examined the impact of increasing the size of the gene network simulated.  
690 Across all network inference algorithms, we found a deterioration in the quality of  
691 the inference. We also computed the gene-gene correlations for various imputation  
692 methods for these larger networks but unexpectedly found no difference compared  
693 to the smaller gene networks, implying the source of the deterioration was elsewhere.  
694 We found that the performance of the network inference seemed to be proportional  
695 to the number of combination reactions (where it is possible to have a gene activated  
696 and inhibited simultaneously) with similar performance recorded for 20 gene networks  
697 and 50 gene networks with the same number of combination reactions. We speculate  
698 that incorporating protein information into inference may help improve performance  
699 in such networks.

700 Finally, we compared our results with two recent complementary studies that in-  
701 vestigated the impact of imputation on network reconstruction performance [80, 81].  
702 In contrast to our study, we note that both these studies used experimental scRNA-  
703 seq data sets where it is usually difficult to determine the ground truth network. In

704 [80], scRNA-seq data of seven different cell types were included, imputation meth-  
705 ods such as MAGIC and SAVER as well as inference methods such as PIDC and  
706 GENIE3 were evaluated in this study. The authors found that MAGIC introduced  
707 high positive correlations and combining SAVER with PIDC led to an increase in  
708 network reconstruction performance, these findings are consistent with our results  
709 (see Supplemental Figures 2, 3, 4 and 5). However, some disagreements with our  
710 results were also observed. For example, while in this study it was reported that  
711 combining SAVER with PIDC gave better results than combining SAVER with GE-  
712 NIE3, we found these combinations of imputation method and network inference  
713 algorithm are comparable regardless of the network sparsity and topology (Supple-  
714 mental Figures 3, 4 and 5). We also found that combining SAVER and GENIE3  
715 does not improve the network inference precision over downsampled data (Supple-  
716 mental Figures 3(C),(G),(K), 4(C),(G) and 5(C),(G)), unlike what was reported in  
717 the aforementioned study where the authors observed that combining SAVER and  
718 GENIE3 does improve network inference performance in some cases. In [81], it was  
719 reported that low capture efficiencies pose a challenge for imputation and network  
720 inference methods and that some imputation methods, namely DCA [23], preserve  
721 the gene-gene correlations structure even though false positive correlations are in-  
722 troduced, these findings are consistent with our results (Supplemental Figures 3, 4  
723 and 5) where we found that for low capture efficiencies, regardless of the imputation  
724 and network inference method, the network inference precision is poor and we also  
725 found that SAVER similar to DCA preserves the gene-gene correlations structure as  
726 mentioned above.

727 In summary, biomodelling.jl uses mechanistic models of gene regulatory network  
728 and stochastic agent-based models of gene expression in cell populations to simulate  
729 realistic scRNA-seq data. This kind of approach is complementary to methods that  
730 are purely statistical and use deep neural networks (see e.g. [82]). As illustrated in

731 this study, this kind of approach that is based on a known ground truth is useful  
732 for bench-marking and development of novel methods for the analysis of scRNA-seq  
733 data and gene-regulatory network inference.

## 734 **5 Availability of data and materials**

735 The raw datasets supporting the conclusions of this article are available in the follow-  
736 ing github repository: [https://github.com/Msturroc/biomodelling\\_benchmark](https://github.com/Msturroc/biomodelling_benchmark).

## 737 **6 Authors contributions statement**

738 A.L., V.S. and M.S. wrote the main manuscript text. A.L. prepared figures and  
739 performed simulations. V.S. and M.S. reviewed the manuscript.

## 740 **7 Ethics and consent to participate**

741 Not applicable to this study.

## 742 **8 Consent to publish**

743 Not applicable to this study.

## 744 **9 Competing interests**

745 The authors have no competing interests as defined by BMC, or other interests that  
746 might be perceived to influence the results and/or discussion reported in this paper.



## <sup>747</sup> Acknowledgements

<sup>748</sup> This work was supported by the European Union's Horizon 2020 research and inno-  
<sup>749</sup> vation programme under the Marie Skłodowska-Curie ITN initiative (Grant number:  
<sup>750</sup> 766069).

## 751 **References**

- 752 [1] Eric Davidson and Michael Levin. Gene regulatory networks. *Proceedings of*  
753 *the National Academy of Sciences*, 102(14):4935–4935, April 2005. Publisher:  
754 National Academy of Sciences Section: Introduction.
- 755 [2] Antoine-Emmanuel Saliba, Alexander J Westermann, Stanislaw A Gorski, and  
756 Jörg Vogel. Single-cell rna-seq: advances and future challenges. *Nucleic acids*  
757 *research*, 42(14):8845–8860, 2014.
- 758 [3] Byungjin Hwang, Ji Hyun Lee, and Duhee Bang. Single-cell RNA sequencing  
759 technologies and bioinformatics pipelines. *Experimental & Molecular Medicine*,  
760 50(8):1–14, August 2018. Number: 8 Publisher: Nature Publishing Group.
- 761 [4] Diether Lambrechts, Els Wauters, Bram Boeckx, Sara Aibar, David Nittner,  
762 Oliver Burton, Ayse Bassez, Herbert Decaluwé, Andreas Pircher, Kathleen  
763 Van den Eynde, Birgit Weynand, Erik Verbeken, Paul De Leyn, Adrian Lis-  
764 ton, Johan Vansteenkiste, Peter Carmeliet, Stein Aerts, and Bernard Thien-  
765 pont. Phenotype molding of stromal cells in the lung tumor microenvironment.  
766 *Nature Medicine*, 24(8):1277–1289, August 2018. Number: 8 Publisher: Nature  
767 Publishing Group.
- 768 [5] Gioele La Manno, Ruslan Soldatov, Amit Zeisel, Emelie Braun, Hannah  
769 Hochgerner, Viktor Petukhov, Katja Lidschreiber, Maria E. Kastriti, Peter  
770 Lönnerberg, Alessandro Furlan, Jean Fan, Lars E. Borm, Zehua Liu, David  
771 van Bruggen, Jimin Guo, Xiaoling He, Roger Barker, Erik Sundström, Gonçalo  
772 Castelo-Branco, Patrick Cramer, Igor Adameyko, Sten Linnarsson, and Peter V.  
773 Kharchenko. RNA velocity of single cells. *Nature*, 560(7719):494–498, August  
774 2018. Number: 7719 Publisher: Nature Publishing Group.

- 775 [6] Malika Saint, François Bertaux, Wenhao Tang, Xi-Ming Sun, Laurence Game,  
776 Anna Köferle, Jürg Bähler, Vahid Shahrezaei, and Samuel Marguerat. Single-cell  
777 imaging and RNA sequencing reveal patterns of gene expression heterogeneity  
778 during fission yeast growth and adaptation. *Nature Microbiology*, 4(3):480–491,  
779 March 2019. Number: 3 Publisher: Nature Publishing Group.
- 780 [7] Christopher A Jackson, Dayanne M Castro, Giuseppe-Antonio Saldi, Richard  
781 Bonneau, and David Gresham. Gene regulatory network reconstruction us-  
782 ing single-cell RNA sequencing of barcoded genotypes in diverse environments.  
783 *eLife*, 9:e51254, January 2020. Publisher: eLife Sciences Publications, Ltd.
- 784 [8] Sara Aibar, Carmen Bravo González-Blas, Thomas Moerman, Vân Anh Huynh-  
785 Thu, Hana Imrichova, Gert Hulselmans, Florian Rambow, Jean-Christophe Ma-  
786 rine, Pierre Geurts, Jan Aerts, Joost van den Oord, Zeynep Kalender Atak,  
787 Jasper Wouters, and Stein Aerts. SCENIC: single-cell regulatory network infer-  
788 ence and clustering. *Nature Methods*, 14(11):1083–1086, November 2017.
- 789 [9] Thalia E. Chan, Michael P. H. Stumpf, and Ann C. Babbie. Gene Regulatory  
790 Network Inference from Single-Cell Data Using Multivariate Information Mea-  
791 sures. *Cell Systems*, 5(3):251–267.e3, September 2017.
- 792 [10] Shuonan Chen and Jessica C. Mar. Evaluating methods of inferring gene regula-  
793 tory networks highlights their lack of performance for single cell gene expression  
794 data. *BMC bioinformatics*, 19(1):232, June 2018.
- 795 [11] Hung Nguyen, Duc Tran, Bang Tran, Bahadır Pehlivan, and Tin Nguyen. A  
796 comprehensive survey of regulatory network inference methods using single cell  
797 rna sequencing data. *Briefings in bioinformatics*, 22(3):bbaa190, 2021.

- 798 [12] Beate Vieth, Swati Parekh, Christoph Ziegenhain, Wolfgang Enard, and Ines  
799 Hellmann. A systematic evaluation of single cell rna-seq analysis pipelines.  
800 *Nature communications*, 10(1):1–11, 2019.
- 801 [13] Giovanni Iacono, Ramon Massoni-Badosa, and Holger Heyn. Single-cell tran-  
802 scriptomics unveils gene regulatory network plasticity. *Genome biology*, 20(1):1–  
803 20, 2019.
- 804 [14] Mo Huang, Jingshu Wang, Eduardo Torre, Hannah Dueck, Sydney Shaffer,  
805 Roberto Bonasio, John I. Murray, Arjun Raj, Mingyao Li, and Nancy R. Zhang.  
806 SAVER: gene expression recovery for single-cell RNA sequencing. *Nature Meth-*  
807 *ods*, 15(7):539–542, July 2018. Number: 7 Publisher: Nature Publishing Group.
- 808 [15] Wei Vivian Li and Jingyi Jessica Li. An accurate and robust imputation method  
809 scImpute for single-cell RNA-seq data. *Nature Communications*, 9(1):997,  
810 March 2018. Number: 1 Publisher: Nature Publishing Group.
- 811 [16] Wuming Gong, Il-Youp Kwak, Pruthvi Pota, Naoko Koyano-Nakagawa, and  
812 Daniel J. Garry. DrImpute: imputing dropout events in single cell RNA se-  
813 quencing data. *BMC Bioinformatics*, 19(1):220, June 2018.
- 814 [17] Mengjie Chen and Xiang Zhou. VIPER: variability-preserving imputation for ac-  
815 curate gene expression recovery in single-cell RNA sequencing studies. *Genome*  
816 *Biology*, 19(1):196, November 2018.
- 817 [18] David van Dijk, Roshan Sharma, Juozas Nainys, Kristina Yim, Pooja Kathail,  
818 Ambrose J. Carr, Cassandra Burdziak, Kevin R. Moon, Christine L. Chaffer,  
819 Diwakar Pattabiraman, Brian Bierie, Linas Mazutis, Guy Wolf, Smita Krish-  
820 naswamy, and Dana Pe’er. Recovering Gene Interactions from Single-Cell Data  
821 Using Data Diffusion. *Cell*, 174(3):716–729.e27, July 2018. Publisher: Elsevier.

- 822 [19] Wenhao Tang, François Bertaux, Philipp Thomas, Claire Stefanelli, Malika  
823 Saint, Samuel Marguerat, and Vahid Shahrezaei. bayNorm: Bayesian gene ex-  
824 pression recovery, imputation and normalization for single-cell RNA-sequencing  
825 data. *Bioinformatics*, 36(4):1174–1181, February 2020.
- 826 [20] Lihua Zhang and Shihua Zhang. Comparison of Computational Methods for  
827 Imputing Single-Cell RNA-Sequencing Data. *IEEE/ACM transactions on com-  
828 putational biology and bioinformatics*, 17(2):376–389, April 2020.
- 829 [21] Wenpin Hou, Zhicheng Ji, Hongkai Ji, and Stephanie C. Hicks. A systematic  
830 evaluation of single-cell RNA-sequencing imputation methods. *Genome Biology*,  
831 21(1):218, August 2020.
- 832 [22] Romain Lopez, Jeffrey Regier, Michael B. Cole, Michael I. Jordan, and Nir  
833 Yosef. Deep generative modeling for single-cell transcriptomics. *Nature Methods*,  
834 15(12):1053–1058, December 2018.
- 835 [23] Gökçen Eraslan, Lukas M. Simon, Maria Mircea, Nikola S. Mueller, and  
836 Fabian J. Theis. Single-cell RNA-seq denoising using a deep count autoencoder.  
837 *Nature Communications*, 10(1):390, January 2019. Number: 1 Publisher: Na-  
838 ture Publishing Group.
- 839 [24] Alberto Santos-Zavaleta, Socorro Gama-Castro, and Ernesto Pérez-Rueda. A  
840 comparative genome analysis of the rpos sigmulon shows a high diversity of  
841 responses and origins. *Microbiology*, 157(5):1393–1401, 2011.
- 842 [25] Lam-Ha Ly and Martin Vingron. Effect of imputation on gene network recon-  
843 struction from single-cell rna-seq data. *bioRxiv*, 2021.
- 844 [26] Diogo M Camacho and James J Collins. Systems biology strikes gold. *Cell*,  
845 137(1):24–26, 2009.

- 846 [27] Irene Cantone, Lucia Marucci, Francesco Iorio, Maria Aurelia Ricci, Vin-  
847 cenzo Belcastro, Mukesh Bansal, Stefania Santini, Mario Di Bernardo, Diego  
848 Di Bernardo, and Maria Pia Cosma. A yeast synthetic network for in vivo as-  
849 sessment of reverse-engineering and modeling approaches. *Cell*, 137(1):172–181,  
850 2009.
- 851 [28] Pedro Mendes, Wei Sha, and Keying Ye. Artificial gene networks for objec-  
852 tive comparison of analysis algorithms. *Bioinformatics*, 19(suppl\_2):ii122–ii129,  
853 2003.
- 854 [29] Tim Van den Bulcke, Koenraad Van Leemput, Bart Naudts, Piet van Remortel,  
855 Hongwu Ma, Alain Verschoren, Bart De Moor, and Kathleen Marchal. Syntren:  
856 a generator of synthetic gene expression data for design and analysis of structure  
857 learning algorithms. *BMC bioinformatics*, 7(1):1–12, 2006.
- 858 [30] Yong Li, Yanming Zhu, Xi Bai, Hua Cai, Wei Ji, and Dianjing Guo. Retrn:  
859 A retriever of real transcriptional regulatory network and expression data for  
860 evaluating structure learning algorithm. *Genomics*, 94(5):349–354, 2009.
- 861 [31] Hendrik Hache, Hans Lehrach, and Ralf Herwig. Reverse engineering of gene  
862 regulatory networks: a comparative study. *EURASIP Journal on Bioinformatics  
863 and Systems Biology*, 2009:1–12, 2009.
- 864 [32] Samuel H Payne. The utility of protein and mrna correlation. *Trends in bio-  
865 chemical sciences*, 40(1):1–3, 2015.
- 866 [33] Sushmita Roy, Margaret Werner-Washburne, and Terran Lane. A system for  
867 generating transcription regulatory networks with combinatorial control of tran-  
868 scription. *Bioinformatics*, 24(10):1318–1320, 2008.

- 869 [34] Hendrik Hache, Christoph Wierling, Hans Lehrach, and Ralf Herwig. Genge:  
870 systematic generation of gene regulatory networks. *Bioinformatics*, 25(9):1205–  
871 1207, 2009.
- 872 [35] Brian C Haynes and Michael R Brent. Benchmarking regulatory network recon-  
873 struction with grendel. *Bioinformatics*, 25(6):801–807, 2009.
- 874 [36] Thomas Schaffter, Daniel Marbach, and Dario Floreano. Genenetweaver: in sil-  
875 ico benchmark generation and performance profiling of network inference meth-  
876 ods. *Bioinformatics*, 27(16):2263–2270, 2011.
- 877 [37] Pau Bellot, Catharina Olsen, Philippe Salembier, Albert Oliveras-Vergés, and  
878 Patrick E Meyer. Netbenchmark: a bioconductor package for reproducible  
879 benchmarks of gene regulatory network inference. *BMC bioinformatics*, 16(1):1–  
880 15, 2015.
- 881 [38] Daniel Marbach, James C Costello, Robert Küffner, Nicole M Vega, Robert J  
882 Prill, Diogo M Camacho, Kyle R Allison, Manolis Kellis, James J Collins, and  
883 Gustavo Stolovitzky. Wisdom of crowds for robust gene network inference. *Nat-  
884 ure methods*, 9(8):796–804, 2012.
- 885 [39] Alex Greenfield, Aviv Madar, Harry Ostrer, and Richard Bonneau. Dream4:  
886 Combining genetic and dynamic information to identify biological networks and  
887 dynamical models. *PloS one*, 5(10):e13397, 2010.
- 888 [40] Luke Zappia, Belinda Phipson, and Alicia Oshlack. Splatter: simulation of  
889 single-cell rna sequencing data. *Genome biology*, 18(1):1–15, 2017.
- 890 [41] Viktor Milkevych, Emre Karaman, Goutam Sahana, Luc Janss, Zexi Cai,  
891 and Mogens Sandø Lund. Mescot: The tool for quantitative trait simulation  
892 through the mechanistic modelling of genes’ regulatory interactions. *G3 Genes—  
893 Genomes— Genetics*, 2021.

- 894 [42] Jeff Bezanson, Alan Edelman, Stefan Karpinski, and Viral B. Shah. Julia: A  
895 fresh approach to numerical computing. *SIAM Review*, 59(1):65–98, 1 2017.  
896 publisher: Society for Industrial and Applied Mathematics.
- 897 [43] Xi-Ming Sun, Anthony Bowman, Miles Priestman, Francois Bertaux, Amalia  
898 Martinez-Segura, Wenhao Tang, Chad Whilding, Dirk Dormann, Vahid  
899 Shahrezaei, and Samuel Marguerat. Size-Dependent Increase in RNA Poly-  
900 merase II Initiation Rates Mediates Gene Expression Scaling with Cell Size.  
901 *Current Biology*, 30(7):1217–1230.e7, April 2020. Publisher: Elsevier.
- 902 [44] Anna D. Broido and Aaron Clauset. Scale-free networks are rare. *Nature Com-*  
903 *munications*, 10(1):1017, March 2019. Number: 1 Publisher: Nature Publishing  
904 Group.
- 905 [45] Raya Khanin and Ernst Wit. How Scale-Free Are Biological Networks. *Journal*  
906 *of Computational Biology*, 13(3):810–818, April 2006. Publisher: Mary Ann  
907 Liebert, Inc., publishers.
- 908 [46] Wilberforce Zachary Ouma, Katja Pogacar, and Erich Grotewold. Topological  
909 and statistical analyses of gene regulatory networks reveal unifying yet quantita-  
910 tively different emergent properties. *PLoS Computational Biology*, 14(4), April  
911 2018.
- 912 [47] Carlos Espinosa-Soto. On the role of sparseness in the evolution of modularity in  
913 gene regulatory networks. *PLOS Computational Biology*, 14(5):e1006172, May  
914 2018. Publisher: Public Library of Science.
- 915 [48] Gareth M. James, Chiara Sabatti, Nengfeng Zhou, and Ji Zhu. Sparse Regula-  
916 tory Networks. *The annals of applied statistics*, 4(2):663–686, June 2010.
- 917 [49] Xiaodong Cai, Juan Andrés Bazerque, and Georgios B. Giannakis. Inference of  
918 Gene Regulatory Networks with Sparse Structural Equation Models Exploiting



- 919 Genetic Perturbations. *PLOS Computational Biology*, 9(5):e1003068, May 2013.  
920 Publisher: Public Library of Science.
- 921 [50] Daniel T. Gillespie. Exact stochastic simulation of coupled chemical reactions.  
922 *The Journal of Physical Chemistry*, 81(25):2340–2361, December 1977. Pub-  
923 lisher: American Chemical Society.
- 924 [51] Daniel T. Gillespie. The chemical Langevin equation. *The Journal of Chemical*  
925 *Physics*, 113(1):297–306, June 2000. Publisher: American Institute of Physics.
- 926 [52] Daniel T. Gillespie. Approximate accelerated stochastic simulation of chemically  
927 reacting systems. *The Journal of Chemical Physics*, 115(4):1716–1733, July  
928 2001. Publisher: American Institute of Physics.
- 929 [53] Hermannus Kempe, Anne Schwabe, Frédéric Crémazy, Pernette J Verschure,  
930 and Frank J Bruggeman. The volumes and transcript counts of single cells reveal  
931 concentration homeostasis and capture biological noise. *Molecular biology of the*  
932 *cell*, 26(4):797–804, 2015.
- 933 [54] Björn Schwanhäusser, Dorothea Busse, Na Li, Gunnar Dittmar, Johannes  
934 Schuchhardt, Jana Wolf, Wei Chen, and Matthias Selbach. Global quantifi-  
935 cation of mammalian gene expression control. *Nature*, 473(7347):337–342, May  
936 2011. Number: 7347 Publisher: Nature Publishing Group.
- 937 [55] Charles P Couturier, Shamini Ayyadhury, Phuong U Le, Javad Nadaf, Jean  
938 Monlong, Gabriele Riva, Redouane Allache, Salma Baig, Xiaohua Yan, Math-  
939 ieu Bourgey, et al. Single-cell rna-seq reveals that glioblastoma recapitulates  
940 a normal neurodevelopmental hierarchy. *Nature communications*, 11(1):1–19,  
941 2020.

- 942 [56] Valentine Svensson, Roser Vento-Tormo, and Sarah A Teichmann. Exponential  
943 scaling of single-cell rna-seq in the past decade. *Nature protocols*, 13(4):599–604,  
944 2018.
- 945 [57] null Barabasi and null Albert. Emergence of scaling in random networks. *Science*  
946 (*New York, N. Y.*), 286(5439):509–512, October 1999.
- 947 [58] Yu Tanouchi, Anand Pai, Heungwon Park, Shuqiang Huang, Rumen Stamatov,  
948 Nicolas E. Buchler, and Lingchong You. A noisy linear map underlies oscillations  
949 in cell size and gene expression in bacteria. *Nature*, 523(7560):357–360, July  
950 2015.
- 951 [59] François Bertaux, Samuel Marguerat, and Vahid Shahrezaei. Division rate, cell  
952 size and proteome allocation: impact on gene expression noise and implications  
953 for the dynamics of genetic circuits. *Royal Society open science*, 5(3):172234,  
954 2018.
- 955 [60] Clotilde Cadart, Sylvain Monnier, Jacopo Grilli, Pablo J Sáez, Nishit Srivastava,  
956 Rafaele Attia, Emmanuel Terriac, Buzz Baum, Marco Cosentino-Lagomarsino,  
957 and Matthieu Piel. Size control in mammalian cells involves modulation of both  
958 growth rate and cell cycle duration. *Nature communications*, 9(1):1–15, 2018.
- 959 [61] Daniel A. Charlebois and Gábor Balázsi. Modeling cell population dynamics.  
960 *In Silico Biology*, 13(1-2):21–39, January 2019. Publisher: IOS Press.
- 961 [62] Thierry Mora and Aleksandra M Walczak. Effect of phenotypic selection on  
962 stochastic gene expression. *The Journal of Physical chemistry B*, 117(42):13194–  
963 13205, 2013.
- 964 [63] Kangtaek Lee and Themis Matsoukas. Simultaneous coagulation and break-up  
965 using constant-n monte carlo. *Powder Technology*, 110(1):82 – 89, 2000.

- 966 [64] Nikos V. Mantzaris. Stochastic and deterministic simulations of heterogeneous  
967 cell population dynamics. *Journal of Theoretical Biology*, 241(3):690 – 706, 2006.
- 968 [65] Philipp Thomas. Intrinsic and extrinsic noise of gene expression in lineage trees.  
969 *Scientific Reports*, 9(1):474, January 2019.
- 970 [66] Allon M. Klein, Linas Mazutis, Ilke Akartuna, Naren Tallapragada, Adrian  
971 Veres, Victor Li, Leonid Peshkin, David A. Weitz, and Marc W. Kirschner.  
972 Droplet barcoding for single-cell transcriptomics applied to embryonic stem cells.  
973 *Cell*, 161(5):1187–1201, May 2015.
- 974 [67] Tracy M. Yamawaki, Daniel R. Lu, Daniel C. Ellwanger, Dev Bhatt, Paolo  
975 Manzanillo, Vanessa Arias, Hong Zhou, Oh Kyu Yoon, Oliver Homann, Songli  
976 Wang, and Chi-Ming Li. Systematic comparison of high-throughput single-cell  
977 RNA-seq methods for immune cell profiling. *BMC Genomics*, 22(1):66, January  
978 2021.
- 979 [68] Catalina A. Vallejos, Davide Risso, Antonio Scialdone, Sandrine Dudoit, and  
980 John C. Marioni. Normalizing single-cell RNA sequencing data: challenges and  
981 opportunities. *Nature Methods*, 14(6):565–571, June 2017. Number: 6 Publisher:  
982 Nature Publishing Group.
- 983 [69] Lucrezia Patruno, Davide Maspero, Francesco Craighero, Fabrizio Angaroni,  
984 Marco Antoniotti, and Alex Graudenzi. A review of computational strategies  
985 for denoising and imputation of single-cell transcriptomic data. *Briefings in*  
986 *Bioinformatics*, 22(4):bbaa222, 2021.
- 987 [70] Thalia E Chan, Ananth V Pallaseni, Ann C Babbie, Kirsten R McEwen, and  
988 Michael PH Stumpf. Empirical bayes meets information theoretical network  
989 reconstruction from single cell data. *BioRxiv*, page 264853, 2018.

- 990 [71] Vân Anh Huynh-Thu, Alexandre Irrthum, Louis Wehenkel, and Pierre Geurts.  
991 Inferring Regulatory Networks from Expression Data Using Tree-Based Meth-  
992 ods. *PLOS ONE*, 5(9):e12776, September 2010. Publisher: Public Library of  
993 Science.
- 994 [72] J. A. Hanley and B. J. McNeil. The meaning and use of the area under a receiver  
995 operating characteristic (ROC) curve. *Radiology*, 143(1):29–36, April 1982.
- 996 [73] Kendrick Boyd, Kevin H. Eng, and C. David Page. Area under the Precision-  
997 Recall Curve: Point Estimates and Confidence Intervals. In Hendrik Blockeel,  
998 Kristian Kersting, Siegfried Nijssen, and Filip Železný, editors, *Machine Learn-*  
999 *ing and Knowledge Discovery in Databases*, Lecture Notes in Computer Science,  
1000 pages 451–466, Berlin, Heidelberg, 2013. Springer.
- 1001 [74] He Haibo. Imbalanced Learning: Foundations, Algorithms, and Applications |  
1002 Wiley.
- 1003 [75] Thalia E Chan, Michael PH Stumpf, and Ann C Babbie. Gene regulatory net-  
1004 work inference from single-cell data using multivariate information measures.  
1005 *Cell systems*, 5(3):251–267, 2017.
- 1006 [76] Tracy M Yamawaki, Daniel R Lu, Daniel C Ellwanger, Dev Bhatt, Paolo Man-  
1007 zanillo, Vanessa Arias, Hong Zhou, Oh Kyu Yoon, Oliver Homann, Songli Wang,  
1008 et al. Systematic comparison of high-throughput single-cell rna-seq methods for  
1009 immune cell profiling. *BMC genomics*, 22(1):1–18, 2021.
- 1010 [77] Martin Barron and Jun Li. Identifying and removing the cell-cycle effect from  
1011 single-cell rna-sequencing data. *Scientific reports*, 6(1):1–10, 2016.
- 1012 [78] Jiajia Liu, Mengyuan Yang, Weiling Zhao, and Xiaobo Zhou. Ccpe: Cell cycle  
1013 pseudotime estimation for single cell rna-seq data. *bioRxiv*, 2021.

- 1014 [79] Chiaowen Joyce Hsiao, PoYuan Tung, John D Blischak, Jonathan E Burnett,  
1015 Kenneth A Barr, Kushal K Dey, Matthew Stephens, and Yoav Gilad. Char-  
1016 acterizing and inferring quantitative cell cycle phase in single-cell rna-seq data  
1017 analysis. *Genome research*, 30(4):611–621, 2020.
- 1018 [80] Lam-Ha Ly and Martin Vingron. Effect of imputation on gene network recon-  
1019 struction from single-cell RNA-seq data. *bioRxiv*, page 2021.04.13.439623, April  
1020 2021. Publisher: Cold Spring Harbor Laboratory Section: New Results.
- 1021 [81] Lisa Maria Steinheuer, Sebastian Canzler, and Jörg Hackermüller. Bench-  
1022 marking scRNA-seq imputation tools with respect to network inference high-  
1023 lights deficits in performance at high levels of sparsity. *bioRxiv*, page  
1024 2021.04.02.438193, April 2021. Publisher: Cold Spring Harbor Laboratory Sec-  
1025 tion: New Results.
- 1026 [82] Mohamed Marouf, Pierre Machart, Vikas Bansal, Christoph Kilian, Daniel S  
1027 Magruder, Christian F Krebs, and Stefan Bonn. Realistic in silico generation and  
1028 augmentation of single-cell rna-seq data using generative adversarial networks.  
1029 *Nature communications*, 11(1):1–12, 2020.

1030 Supplemental material for “Benchmarking  
1031 imputation methods for network inference using a  
1032 novel method of synthetic scRNA-seq data  
1033 generation”

1034 1 Choosing threshold parameter for network in-  
1035 ference algorithms

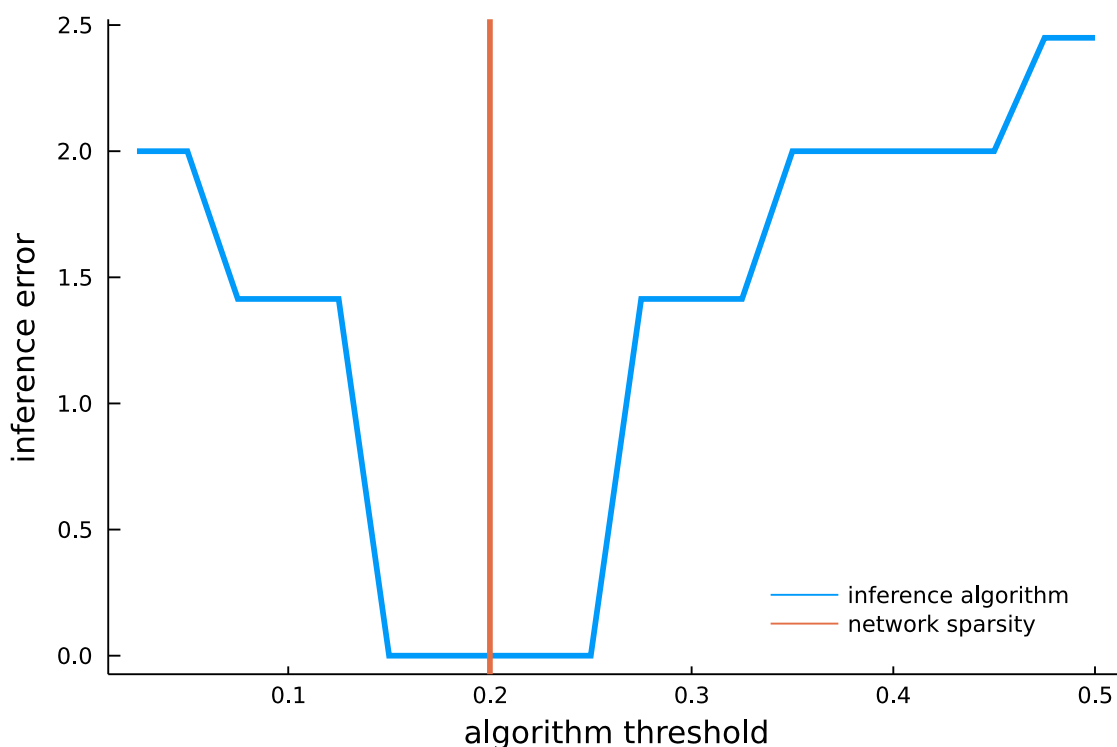

Supplemental Figure 1: Impact of varying threshold parameter for network inference algorithms: plot showing PIDC inference error (as defined by the  $l_2$  norm of predicted adjacency matrix with ground truth adjacency matrix) as a function of the algorithm threshold for a 5-gene network toy example. The orange solid line is the network sparsity and the blue solid line represents the network inference algorithm error.

## 1036 **2 Example gene-gene correlations**

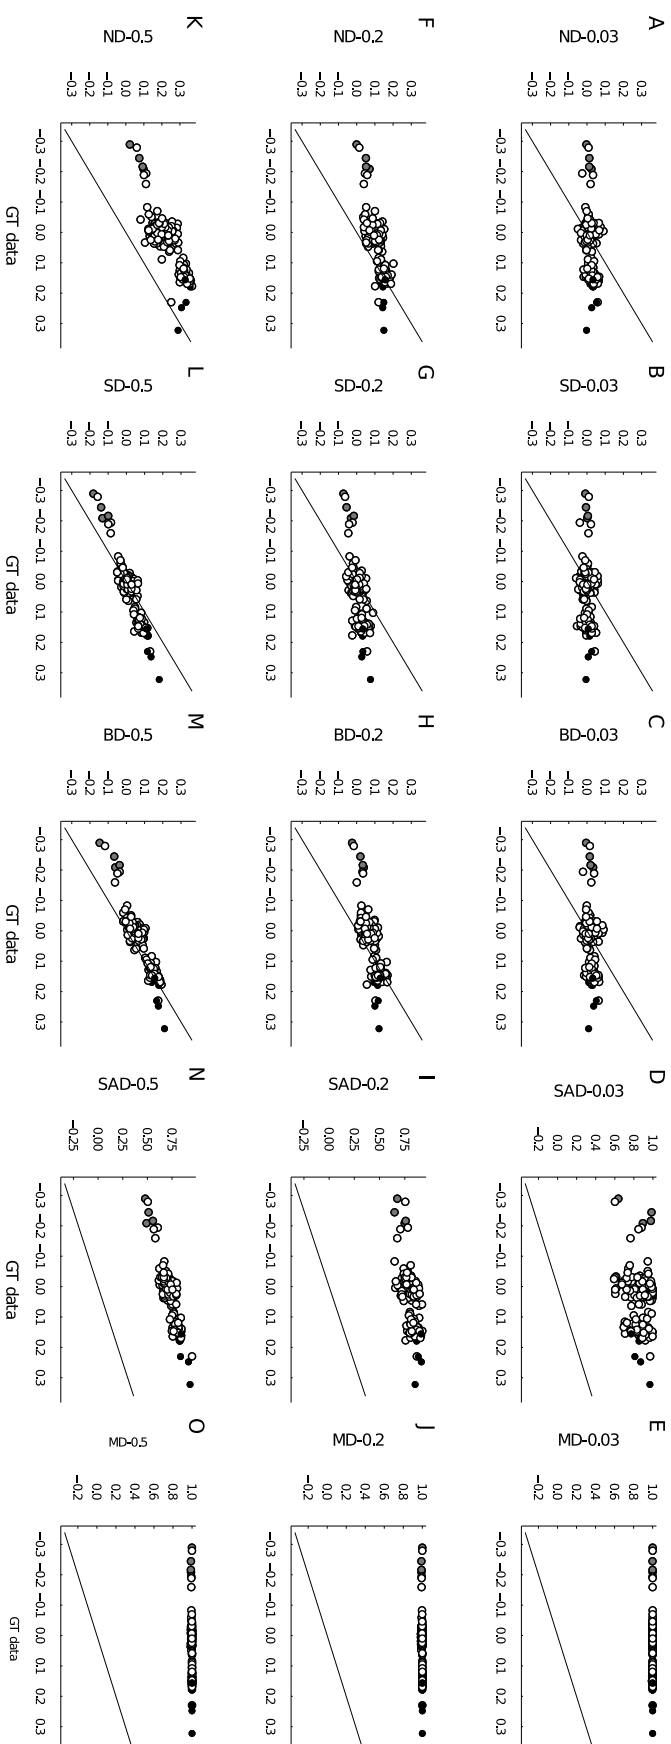

Supplemental Figure 2: Impact of imputation on Pearson gene-gene correlations : results for capture efficiency rates 0.03, 0.2 and 0.5 are shown in the first, second and third row respectively and the imputation/scaling methods appear in the y-axis label of each plot. The x-axis show the gene-gene correlations in GT data. The black solid line represents the linear equation  $x = y$ , black dots are activation type reactions, grey dots are inhibition type reactions and open circles represent non-reacting type.



### 1037 **3 Inference precision: 20 gene additive regulation**

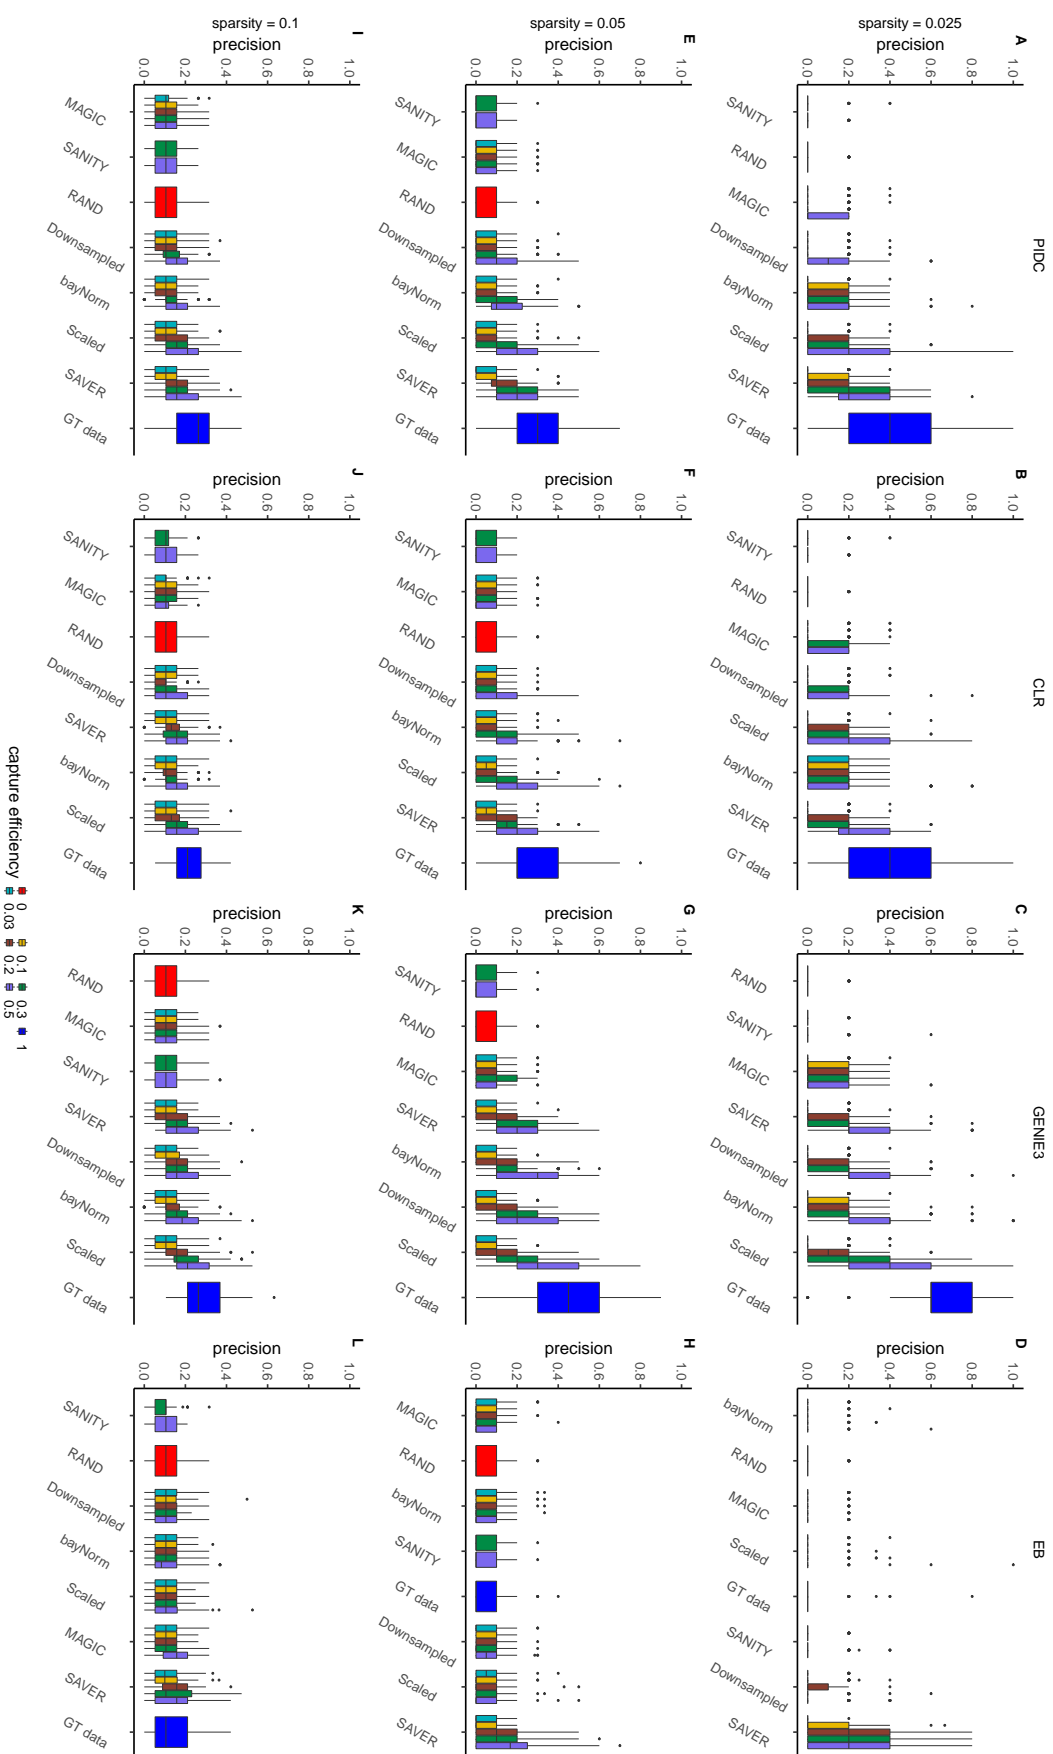

1038 **4 Inference precision: 20 gene multiplicative reg-**  
1039 **ulation**

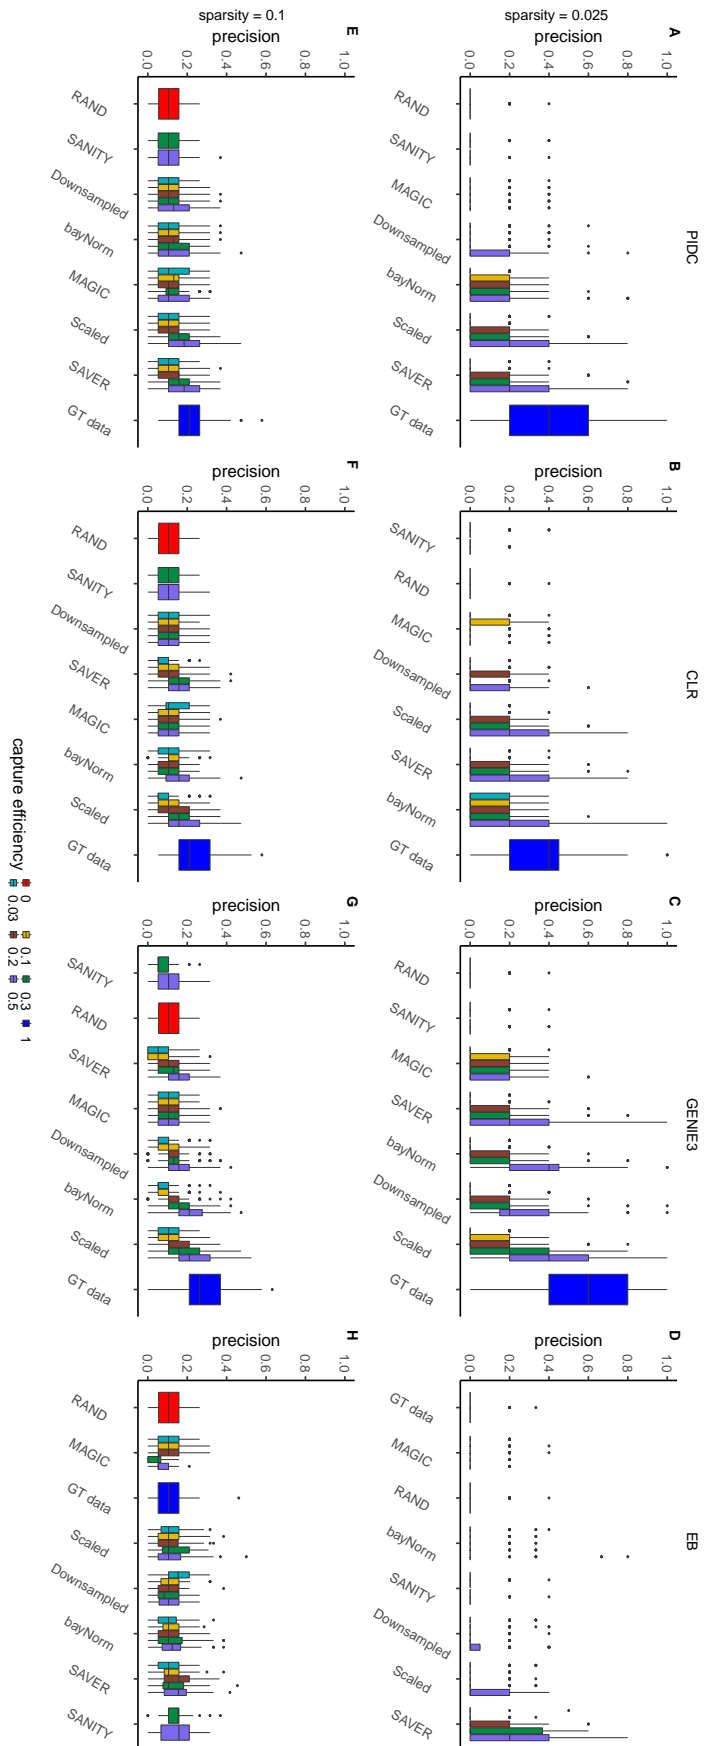

Supplemental Figure 4: Impact of imputation on network inference performance for 100 different simulated 20 gene networks using sparsity = 0.025 and 0.1 with **multiplicative regulation** for various captures efficiency. RAND corresponds to precision obtained using random classification and GT data corresponds to precision obtained without downsampling (i.e., capture efficiency is set to 1). Plots (A) to (D) show box-plots of precision scores obtained for different imputation algorithms displayed on x-axes for PIDC, CLR, GENIE3 and Empirical Bayes respectively with sparsity = 0.025. Plots (E) to (H) show box-plots of precision scores obtained for different imputation algorithms displayed on x-axes for PIDC, CLR, GENIE3 and Empirical Bayes respectively with sparsity = 0.1.

1040 **5 Inference precision: 50 gene case, two different**  
1041 **sparsity levels**

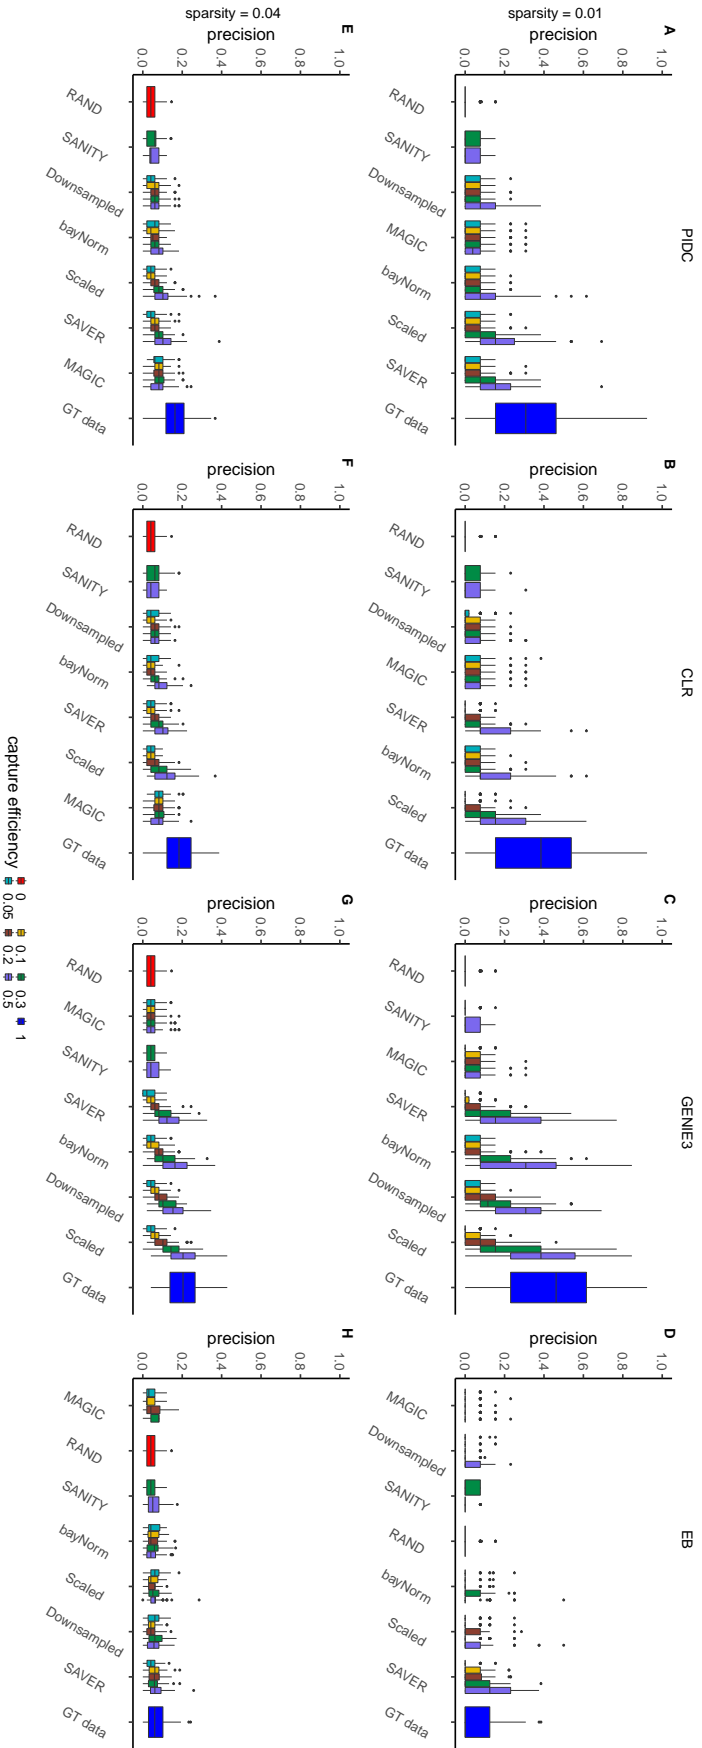

Supplemental Figure 5: Impact of imputation on network inference performance for 100 different simulated 50 gene networks using sparsity = 0.01 and 0.04 with **multiplicative regulation** for various captures efficiency. RAND corresponds to precision obtained using random classification and GT data corresponds to precision obtained without downsampling (i.e., capture efficiency is set to 1). Plots (A) to (D) show box-plots of precision scores obtained for different imputation algorithms displayed on x-axes for PIDC, CLR, GENIE3 and Empirical Bayes respectively with sparsity = 0.01. Plots (E) to (H) show box-plots of precision scores obtained for different imputation algorithms displayed on x-axes for PIDC, CLR, GENIE3 and Empirical Bayes respectively with sparsity = 0.04.

1042 **6 Number of combination reactions in both 20**  
1043 **and 50 gene networks**

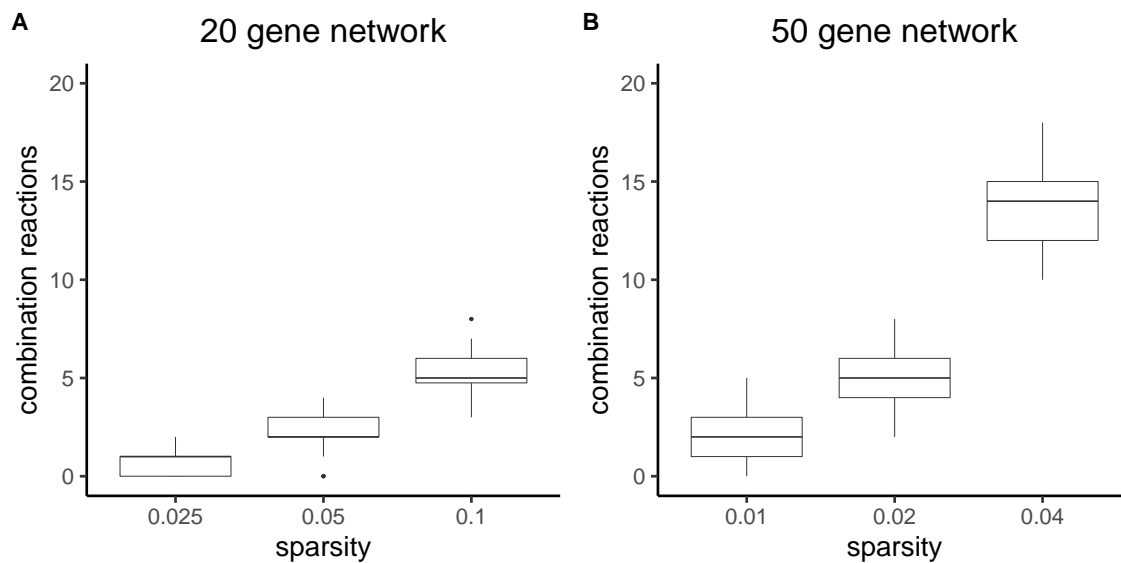

Supplemental Figure 6: Number of combination reactions in 100 models of 20-genes and 50-genes networks for different sparsity levels. (A) box-plots of the number of combination reactions in 20-genes network for sparsity = 0.025, 0.05 and 0.1. (B) box-plots of the number of combination reactions in 50-genes network for sparsity = 0.01, 0.02 and 0.04.

1044 **7 Comparison of 20 gene network with 0.1 spar-**  
1045 **sity and 50 gene network with 0.02 sparsity**

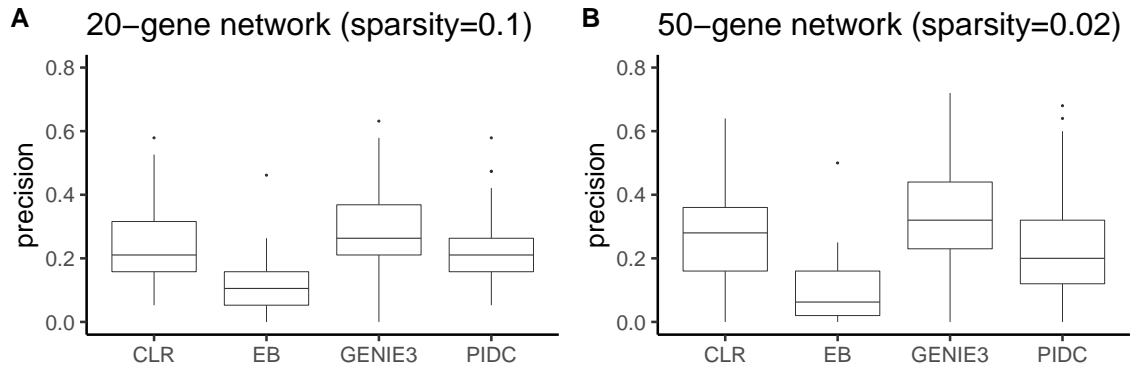

Supplemental Figure 7: Performance of 100 models of 20-genes and 50-genes networks for 0.1 and 0.02 sparsity levels respectively. (A) box-plots of the precision for 100 20-genes networks with sparsity = 0.1. (B) box-plots of the precision for 100 50-genes networks with sparsity = 0.02.
